# Supplementary material for: Scrutinizing ligand exchange reactions in the formation of the precious group metal–organic framework RuII,II-HKUST-1: the impact of diruthenium tetracarboxylate precursor and modulator choice
Source: Royal Society of Chemistry journal article supplement (doi:10.1039/d1dt00118c), 2021-01-01
Supplement: d1dt00118c1.pdf [file d1dt00118c1.pdf]

Supporting Information

**Scrutinizing Ligand Exchange Reactions in the Formation of the Precious Group Metal-Organic Framework RuII,II-HKUST-1: The Impact of Diruthenium Tetracarboxylate Precursor and Modulator Choice**

Werner R. Heinz,<sup>a</sup> Dominik Staude,<sup>a</sup> David Mayer,<sup>a</sup> Hana Bunzen,<sup>b</sup> and Roland A. Fischer<sup>a,\*</sup>

<sup>a</sup> Chair of Inorganic and Metal-Organic Chemistry, Department of Chemistry, Technical University of Munich, Lichtenbergstraße 4, 85748 Garching, Germany. E-mail: [roland.fischer@tum.de](mailto:roland.fischer@tum.de)

<sup>b</sup> Chair of Solid State and Materials Chemistry, Institute of Physics, University of Augsburg, Universitätsstraße 1, 86159 Augsburg, Germany. E-mail: [hana.bunzen@physik.uni-augsburg.de](mailto:hana.bunzen@physik.uni-augsburg.de)

# Table of Contents

|                                                                   |    |
|-------------------------------------------------------------------|----|
| Experimental Details .....                                        | 4  |
| General considerations.....                                       | 4  |
| Instrumentation .....                                             | 4  |
| Gloveboxes .....                                                  | 4  |
| Powder X-Ray diffraction.....                                     | 4  |
| Single crystal X-Ray diffraction .....                            | 4  |
| Elemental Analysis.....                                           | 5  |
| Gas sorption measurements .....                                   | 5  |
| Fourier-transform infrared spectroscopy.....                      | 5  |
| Raman spectroscopy .....                                          | 5  |
| NMR spectroscopy.....                                             | 5  |
| LIFDI mass spectrometry .....                                     | 5  |
| Thermogravimetric analysis .....                                  | 5  |
| High-resolution transmission electron microscopy.....             | 6  |
| Synthesis of Precursor Complexes.....                             | 6  |
| General Procedure via the “blue solutions of ruthenium (II) ..... | 6  |
| Additional Information – Precursor Characterization .....         | 7  |
| Diruthenium tetraacetate .....                                    | 7  |
| Diruthenium tetrabenzoate.....                                    | 7  |
| Diruthenium tetra (4-fluoro benzoate) .....                       | 7  |
| Diruthenium tetrakis (4-trifluoromethyl benzoate) .....           | 7  |
| Diruthenium tetra (4-methyl benzoate).....                        | 7  |
| Diruthenium tetra (4-methoxy benzoate).....                       | 7  |
| Diruthenium tetrakis (3,5-dimethoxy benzoate).....                | 7  |
| Diruthenium tetraacetate chloride .....                           | 7  |
| Diruthenium tetra (L-mandelate) .....                             | 8  |
| PXRD .....                                                        | 9  |
| FT-IR spectra .....                                               | 10 |
| SC-XRD Structures .....                                           | 12 |
| $\text{Ru}_2(\text{OBz-CF}_3)_4(\text{THF})_2$ .....              | 12 |
| $\text{Ru}_2(\text{OBz-Me})_4(\text{Me}_2\text{CO})_2$ .....      | 16 |
| $\text{Ru}_2(\text{OBz-OMe})_4(\text{Me}_2\text{CO})_2$ .....     | 19 |
| $\text{Ru}_2(\text{OBz-(OMe)}_2)_4(\text{Me}_2\text{CO})_2$ ..... | 22 |
| $\text{Ru}_2(\text{OBz-F})_4(\text{Me}_2\text{CO})_2$ .....       | 25 |

|                                                                                        |    |
|----------------------------------------------------------------------------------------|----|
| Structural Properties of Diruthenium Tetracarboxylates – Bond Lengths and Angles ..... | 29 |
| Additional Information – Ligand Exchange Test Reaction .....                           | 30 |
| Additional Information – MOF Characterization .....                                    | 34 |
| Development of a Modified MOF Synthesis Procedure .....                                | 34 |
| MOF Synthesis Details .....                                                            | 35 |
| Sample Appearance.....                                                                 | 35 |
| Powder X-Ray Diffraction .....                                                         | 36 |
| Composition & Porosity.....                                                            | 43 |
| Vibrational spectroscopy.....                                                          | 45 |
| HR-TEM.....                                                                            | 50 |

## Experimental Details

### General considerations

Trimesic acid (Sigma-Aldrich),  $\text{RuCl}_3 \cdot x \text{H}_2\text{O}$  (Precious Metals Online) and HPLC-grade acetone and ethanol (VWR Chemicals) were purchased commercially and used without further purification. Substituted benzoic acid derivatives were purchased from Sigma-Aldrich (analytical grade) and used without further purification. 4-Methyl benzoic acid sodium salt was prepared by neutralization of the acid in aqueous NaOH and subsequent solvent removal. Ultra-pure water was obtained using a Milli-Q purification system ( $18.2 \text{ M}\Omega \text{ cm}^{-1}$ ). Dichloromethane, diethyl ether and tetrahydrofuran were purified and dried using a MBraun SPS-800 and additionally degassed and stored under argon atmosphere. All complexes and MOFs were synthesized under exclusion from air and handled in a using argon-filled (>99.996%; Westfalen) glovebox.

### Instrumentation

#### Gloveboxes

MOF synthesis including degassed solvent and water were performed in an MBraun 500 glovebox operated under wet conditions in argon atmosphere. Activated MOF samples were stored and handled in another glovebox under dry Ar atmosphere conditions.

#### Powder X-Ray diffraction

All diffraction patterns were collected on a PANalytical Empyrean equipped with a Cu X-ray tube ( $\lambda = 0.154 \text{ nm}$ ) operated at 45 kV and 40 mA in a  $2\theta$  range of  $5\text{-}50^\circ$  in steps of  $0.0065651^\circ$  ( $2\theta$ ) with 0.175 s/step. The incident beam was focussed on the sample through a focusing beam mirror with a  $1/8^\circ$  divergence slit and a nickel beta filter (0.2 mm). A PIXcel1D detector was used in receiving mode with a  $1/8^\circ$  anti-scatter slit and 0.04 rad soller slits. The activated MOF samples and dried precursor adducts were filled in borosilicate capillaries of 0.5 mm inner diameter and mounted onto a capillary spinner. Free carboxylic acid reference spectra were measured with reflection-transmission-spinner (RTS) mode.

#### Single crystal X-Ray diffraction

Single crystal structures of related precursor complexes were either measured on a Bruker D8 Venture diffractometer equipped with a Helios optic monochromator, a Photon 100 CMOS detector and a Mo IMS microsource ( $\lambda = 0.71073 \text{ \AA}$ ), or on a Bruker D8 Venture diffractometer equipped with a Helios optic monochromator, a Photon 100 CMOS detector and a Mo rotating anode source ( $\lambda = 0.71073 \text{ \AA}$ ), at 100(2) K. The raw area detector data frames were reduced and corrected for absorption effects using the SAINT and SADABS programs with multi-scan absorption correction. Final unit cell parameters were determined by least-squares refinement of the respective independent reflections taken from the data sets. The structures were solved by intrinsic phasing with SHELXT. Difference Fourier calculations and full-matrix least-squares refinements against  $F^2$  were performed by SHELXL-2014/7 (Sheldrick, 2014). All non-hydrogen atoms were refined with anisotropic displacement parameters. Hydrogen atoms throughout could not be located in the Fourier maps and were calculated in ideal positions using a riding model ( $d(\text{C-H}) = 0.95 \text{ \AA}$ ,  $U_{\text{ISO}}(\text{H}) = U_{\text{EQ}}(\text{C})$ ). Disordered solvent molecules, which could not properly be refined were treated as diffuse contribution to the overall scattering without specific positions using the Squeeze routine in Platon. Single crystals were directly taken from the reaction solution and fixed on microsampler using perfluorated ether under an Ar counterflow. Crystal structure graphics were created using Mercury software.

## Elemental Analysis

Determination of the elemental composition was performed together with the microanalytical laboratories of the chemistry department at the Technical University of Munich. Determination of C, H, N and S was carried out with a Hekatech EuroEA elemental analyser with samples of 1-3 mg. Samples were decomposed at  $T > 1000\text{ }^{\circ}\text{C}$  in oxygen atmosphere and decomposition gases purified and separated through a GC column. Detection and quantification of  $\text{CO}_2$ ,  $\text{H}_2\text{O}$ ,  $\text{NO}_2$  and  $\text{SO}_2$  allowed to derive elemental contents. Metal contents were derived from TGA-based metal oxide residues as reported earlier.<sup>1</sup> Low sample amounts obstructed the analysis of F contents in OBz-F and OBz-CF<sub>3</sub> samples.

## Gas sorption measurements

Sorption experiments were conducted using a *Micromeritics 3Flex* with each ~50 mg of desolvated sample. Prior to the measurement each sample was additionally degassed at  $150\text{ }^{\circ}\text{C}$  for >10h. Nitrogen isotherms were recorded at 77 K. The BET surface area was calculated using data points in the relative pressure range of 0.01 to 0.1 in the adsorption branch with the *Rouquerol* consistency criteria considered.

## Fourier-transform infrared spectroscopy

FT-IR spectra were recorded from finely ground activated powder samples under argon atmosphere in a glovebox using a *Bruker ALPHA* FTIR spectrometer equipped with a Pt attenuated total reflectance (ATR) unit at room temperature in the range of 400 to  $4000\text{ cm}^{-1}$  with a resolution of  $2\text{ cm}^{-1}$  and 24 scans per measurement. A pyroelectric deuterated L-alanine doped triglycine sulfate (RT-DLaTGS) detector was used.

## Raman spectroscopy

Raman spectroscopy was measured with an *inVia Reflex* Raman System with an optical microscope (Leica DM2700M, 50x magnification) coupled to a *Renishaw R04* Raman spectrometer with 532 nm laser wavelength (Laser: RL532C, Class 3B) with activated samples filled into Borosilicate glass capillaries (0.5 mm inner diameter) under argon atmosphere. A Renishaw 266n10 detector was used. All samples were measured with 10 s exposure time, 1 % laser power and 10 accumulations.

## NMR spectroscopy

Standard liquid <sup>1</sup>H-NMR spectra were recorded with a *Bruker AV400US* at 400 MHz at 298 K. Kinetic measurements and <sup>19</sup>F-NMR were measured using a *Bruker DRX400* (400 MHz) with implemented heating module at 298 K unless otherwise stated. Sensitive samples were prepared using degassed deuterated solvents. MestreNova was used for data analysis applying manual phase correction and automated baseline correction (Whittaker Smoother). Chemical shifts are given in parts per million (ppm) and calibrated to the residual proton signal of the deuterated solvent. Multiplicity is given as s – singlet as paramagnetic ruthenium accounts for significant line broadening.

## LIFDI mass spectrometry

Liquid injection field desorption ionization mass spectrometry was measured on a *Waters LCT Micromass* TOF MS with additional LIFDI module using a current of 80 mA for sample evaporation. Prior to measurements, dissolved samples were filtered through 0.2 μm syringe filter (PTFE). Instrument control and data analysis was performed using *MassLynx NT* software package.

## Thermogravimetric analysis

Thermal analysis of the materials was determined with a Mettler Toledo TGA/DSC 3+ in aluminium oxide crucibles (70 μL with lid) with sample amounts of 1 to 5 mg. Samples of activated materials were taken under inert conditions in a glovebox and transferred to the measurement chamber in screw capped vials immediately prior to the measurement. The following thermal program was applied using

synthetic air (20 mL min<sup>-1</sup>, Westfalen, 80% N<sub>2</sub>; 20% O<sub>2</sub>): At 30 °C isothermal equilibration (15 min), ramp from 30 °C to 700 °C with 10 K min<sup>-1</sup>, at 700 °C isothermal equilibration (15 min).

High-resolution transmission electron microscopy

TEM and STEM micrographs and EDS elemental mappings were recorded with a JEM NEOARM microscope (JEOL) with a cold FEG electron source operated at 200 kV. Samples were prepared by depositing a drop of the crystalline products dispersed in ethanol onto carbon-coated copper grids (200 mesh) and dried in air.

### Synthesis of Precursor Complexes

All syntheses were performed under exclusion from air and with degassed solvents and solutions. The obtained powders crystallize as adducts coordinating two solvent molecules (THF or acetone) on the axial positions of the PW. XRD measurements were performed with these adducts, while all other characterizations (yield, NMR, IR, EA) were performed with the amorphized desolvated complexes after thermal activation at 80 °C for 12 h. Reaction yields of isolated complexes refer to RuCl<sub>3</sub> assumed as dihydrate.

General Procedure via the “blue solutions of ruthenium (II)

Acetate and benzoate precursor complexes were synthesized according to literature procedures via the “blue solutions” of Ru<sup>2+</sup> with slight modifications.<sup>2</sup> The blue solutions were prepared in a *Fisher Porter* bottle using carefully degassed dispersions of RuCl<sub>3</sub>·x H<sub>2</sub>O (1-3 g, 1.0 eq.) and PtO<sub>2</sub> (17.9 mg) in MeOH (10-30 mL). The black mixtures were stirred for 3 h under hydrogen atmosphere (3 bar). The resulting deep blue solution was filtered through a Schlenk frit into a solution of the respective carboxylic acid alkali metal salt (2.5-2.8 eq for sodium benzoates, 5.8 eq for lithium acetate) in MeOH (10-30 mL). The whole mixture was heated to reflux for 24 h. Workup of the Ru<sub>2</sub>(OAc)<sub>4</sub> was performed by removal of the supernatant by *Whatman* filtration and successive drying of the formed microcrystalline powder in argon stream. Workup of methyl benzoate and methoxy benzoate complexes was achieved by an additional washing step of the precipitate with hot MeOH. All other diruthenium tetrabenzoate complexes were isolated by removal of the solvent in vacuo and subsequent extraction with hot acetone, concentration of the extract, and crystallisation at -32 °C.

## Additional Information – Precursor Characterization

### Diruthenium tetraacetate

$\text{Ru}_2(\text{OAc})_4$  was synthesized according to above-mentioned modified literature procedure.<sup>2</sup> Yield: 43 % of a brown powder. <sup>1</sup>H-NMR: (400 MHz, THF-*d*<sup>8</sup>, 298 K):  $\delta$  [ppm] = 1.09 (s, 12H, CH<sub>3</sub>); EA: (calc / found %): C (21.9/21.3), H (2.76/2.68); LIFDI-MS (THF): (calc/found) *m/z* = (438.32/438.68).

### Diruthenium tetrabenzoate

$\text{Ru}_2(\text{OBz})_4$  was synthesized according to above-mentioned modified literature procedure.<sup>2</sup> Yield: 17 % of a brown powder. <sup>1</sup>H-NMR: (400 MHz, THF-*d*<sup>8</sup>, 298 K):  $\delta$  [ppm] = 16.50 (s, 8H, *ortho*-H), 10.71 (s, 4H, *para*-H), 9.26 (s, 8H, *meta*-H); EA: (calc / found %): C (49.0/49.0), H (2.94/3.00); LIFDI-MS (THF): (calc/found) *m/z* = (686.6/687.1).

### Diruthenium tetra (4-fluoro benzoate)

$\text{Ru}_2(\text{OBz-F})_4$  was synthesized according to above-mentioned modified literature procedure.<sup>2</sup> Yield: 40 % of a dark brown powder. <sup>1</sup>H-NMR: (400 MHz, THF-*d*<sup>8</sup>, 298 K):  $\delta$  [ppm] = 16.47 (s, 8H, *ortho*-H), 9.00 (s, 8H, *meta*-H); EA: (calc / found %): C (44.3/43.5), H (2.13/2.15); LIFDI-MS (THF): (calc/found) *m/z* = (758.6/759.6).

### Diruthenium tetrakis (4-trifluoromethyl benzoate)

$\text{Ru}_2(\text{OBz-CF}_3)_4$  was synthesized according to above-mentioned modified literature procedure.<sup>2</sup> Yield: 18 % of an orange powder. <sup>1</sup>H-NMR: (400 MHz, THF-*d*<sup>8</sup>, 298 K):  $\delta$  [ppm] = 16.63 (s, 8H, *ortho*-H), 9.64 (s, 8H, *meta*-H); EA: (calc / found %): C (40.1/39.9), H (1.68/1.64); LIFDI-MS (THF): (calc/found) *m/z* = (958.6/959.9).

### Diruthenium tetra (4-methyl benzoate)

$\text{Ru}_2(\text{OBz-Me})_4$  was synthesized according to above-mentioned modified literature procedure.<sup>2</sup> Yield: 47 % of a light brown powder. <sup>1</sup>H-NMR: (400 MHz, THF-*d*<sup>8</sup>, 298 K):  $\delta$  [ppm] = 16.45 (s, 8H, *ortho*-H), 9.20 (s, 8H, *meta*-H) 2.96 (s, 12H, CH<sub>3</sub>); EA: (calc / found %): C (51.8/50.0), H (3.80/3.76); LIFDI-MS (THF): (calc/found) *m/z* = (742.7/743.1).

### Diruthenium tetra (4-methoxy benzoate)

$\text{Ru}_2(\text{OBz-OMe})_4$  was synthesized adopting the above-mentioned procedure. Yield: 34 % of a brown powder. <sup>1</sup>H-NMR: (400 MHz, THF-*d*<sup>8</sup>, 298 K):  $\delta$  [ppm] = 16.66 (s, 8H, *ortho*-H), 8.75 (s, 8H, *meta*-H) 4.79 (s, 12H, OCH<sub>3</sub>); EA: (calc / found %): C (47.6/45.4), H (3.50/3.32).

### Diruthenium tetrakis (3,5-dimethoxy benzoate)

$\text{Ru}_2(\text{OBz-(OMe)}_2)_4$  was synthesized by adopting the above-mentioned procedure via the blue solutions. Yield: 34 % of a light brown powder (86% purity according to NMR and 14% free acid impurity). <sup>1</sup>H-NMR: (400 MHz, THF-*d*<sup>8</sup>, 298 K):  $\delta$  [ppm] = 15.53 (s, 8H, *ortho*-H), 9.63 (s, 4H, *para*-H) 4.69 (s, 24H, OCH<sub>3</sub>); EA: (calc / found %): C (46.7/45.2), H (3.92/3.82).

### Diruthenium tetraacetate chloride

$\text{Ru}_2(\text{OAc})_4\text{Cl}$  was synthesized according to modified literature procedures.<sup>3</sup> A mixture of  $\text{RuCl}_3 \cdot x \text{H}_2\text{O}$  (7.5 g, 28.7 mmol, 1.0 eq.) and LiCl (7.5 g, XX mmol, XX eq), acetic acid (190 mL) and acetic anhydride (100 mL) was degassed by a stream of argon over 30 min and subsequently heated to reflux for 3 d in argon atmosphere. After cooldown to ambient temperature, the red brown precipitate was collected by filtration in air. The crude product was washed with cold acetone until the washing solution remained colorless and subsequently dried in vacuo. Yield: 73 % of a red brown powder. EA: (calc / found %): C (20.3/20.1), H (2.55/2.49).

### Diruthenium tetra (L-mandelate)

$\text{Ru}_2(\text{mand})_4$  was synthesized according to a literature procedure.<sup>4</sup>  $\text{Ru}_2(\text{OAc})_4\text{Cl}$  (202 mg, 0.43 mmol, 1 eq.) and L-mandelic acid (1.6 g, 10.52 mmol, 24 eq.) were dissolved in  $\text{H}_2\text{O}$  (125 mL) and heated to reflux for 90 min. The resulting yellow green solution was slowly cooled down to 4 °C. After 8 d, the supernatant was removed via *Whatman* filtration and the golden microcrystalline powder carefully dried under reduced pressure. After sampling for PXRD, the remaining solid was desolvated at 80 °C for 60 h. Yield: 21 % of a golden powder.  $^1\text{H-NMR}$ : (400 MHz,  $\text{CD}_3\text{CN}$ , 298 K):  $\delta$  [ppm] = 14.30 (s, 8H, *ortho*-H), 11.50 (s, 4H, *para*-H) 9.91 (s, 8H, *meta*-H) 9.48 (s, 4H,  $\text{CH}_{\text{aliph}}$ ) 9.19 (s, 4H, OH); EA: (calc / found %): C (47.6/46.1), H (3.50/3.34).



PXRD

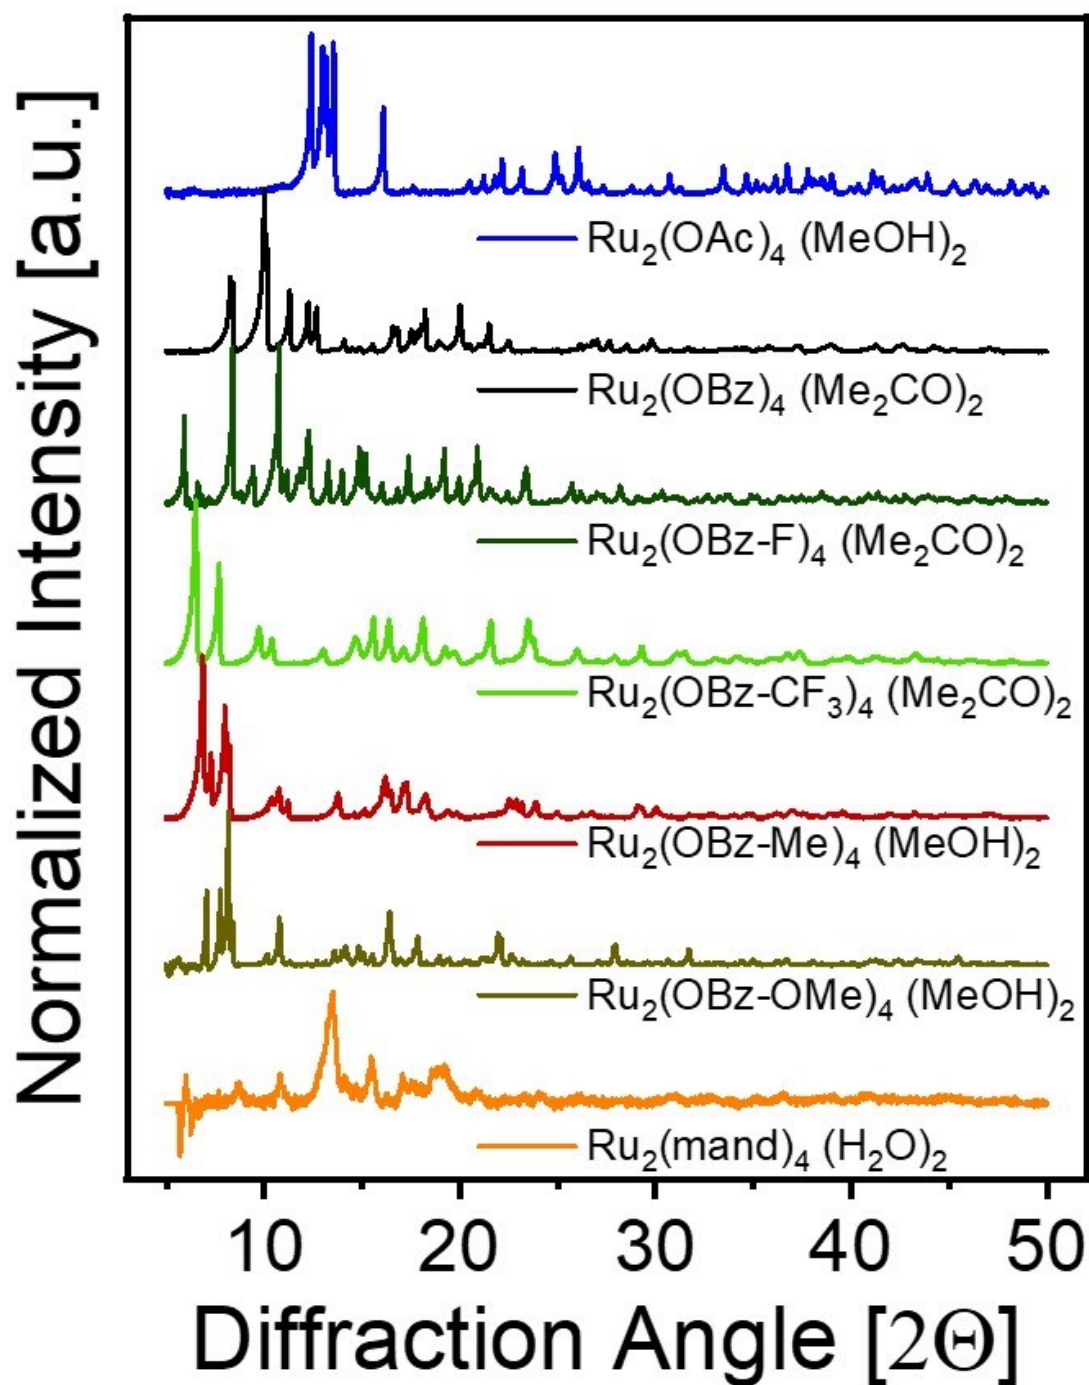

Figure S 1: Background-corrected and normalized PXRD pattern of the obtained univalent Ru-PW precursor adducts of methanol, water or acetone as indicated. Note that, low signal intensity and instrumental reasons caused a negative baseline for Ru<sub>2</sub>(mand)<sub>4</sub> (H<sub>2</sub>O)<sub>2</sub> sample. Precursors were desolvated prior to usage in MOF syntheses.

FT-IR spectra

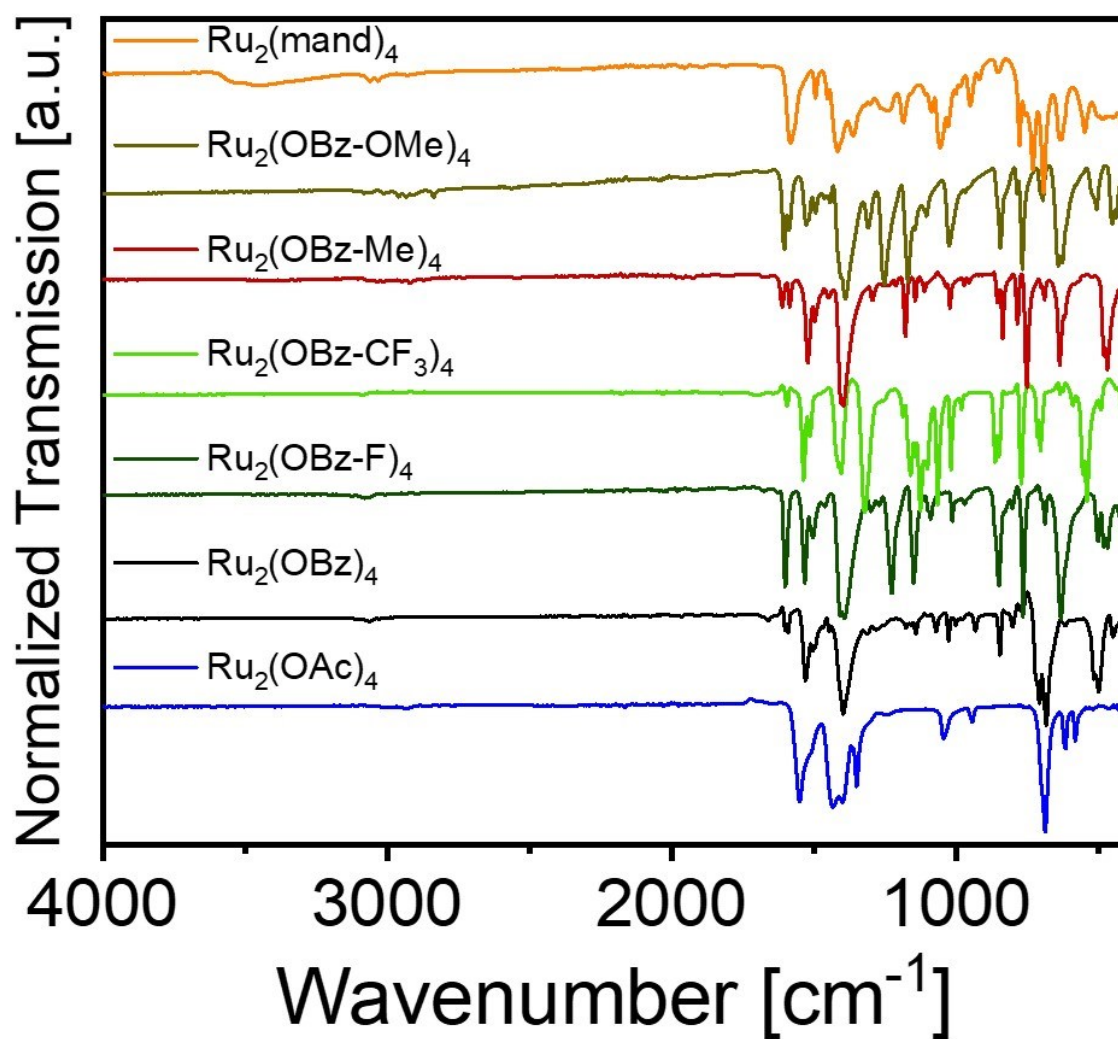

Figure S 2: Stacked and normalized FT-IR spectra of the Ru-PW precursors complexes used for MOF syntheses.

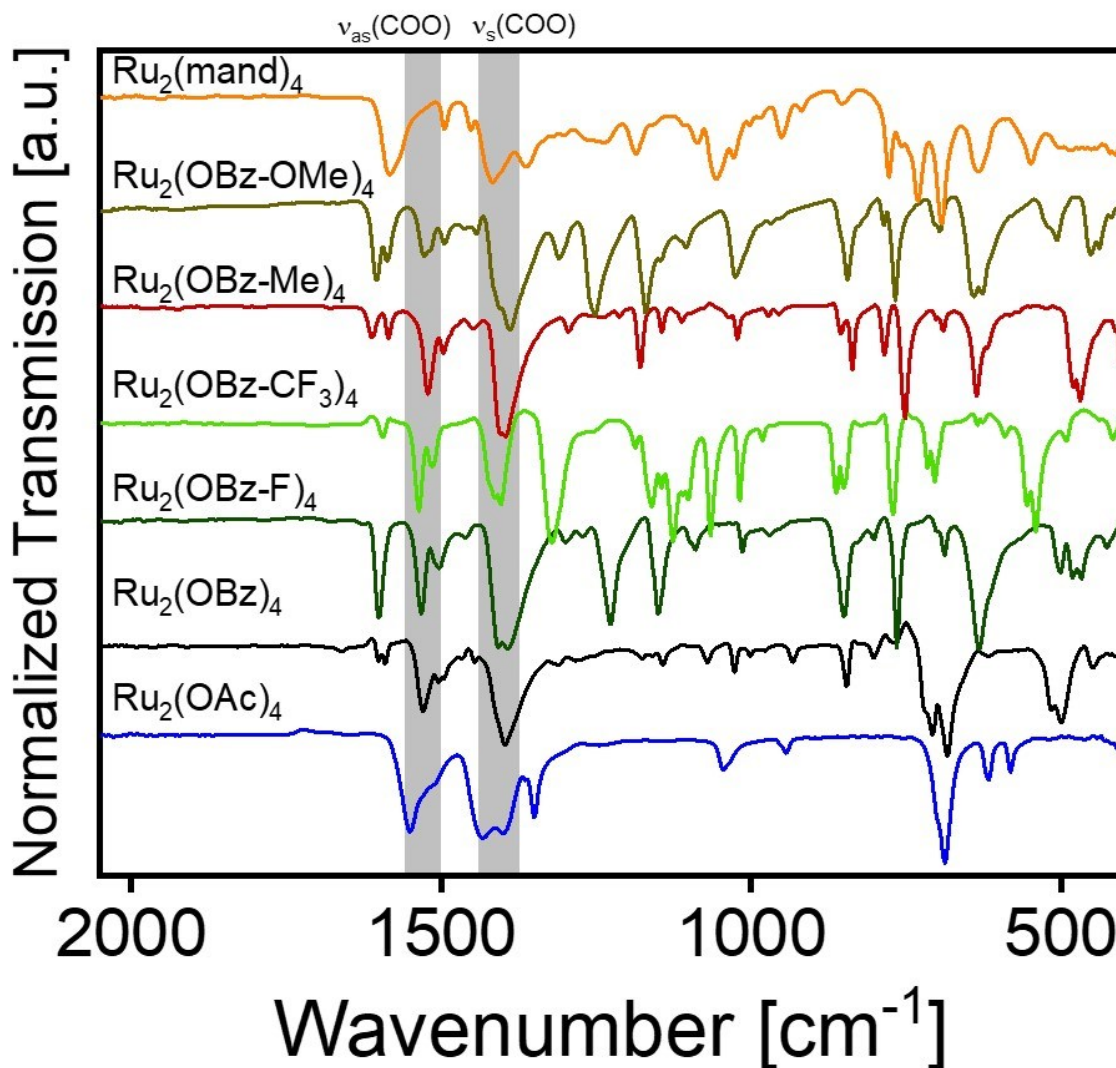

Figure S 3: Selected region (2000-400  $\text{cm}^{-1}$ ) of FT-IR spectra of the univalent Ru-PW precursor complexes. The highlighted regions indicate the asymmetric and symmetric carboxylate stretch vibrations indicating the +II / +II valency. Note that, apparently the adjacent hydroxy side groups of the ruthenium mandelate precursor cause a blue shift of  $\nu_{as}(\text{COO})$  towards absorption at 1583  $\text{cm}^{-1}$ .

## SC-XRD Structures

Single crystal X-ray crystallography of the diruthenium(II,II) tetra- $\mu$ -carboxylate paddlewheel complexes were mainly affected by their crystallization behavior (solubility issues) and their air sensitivity, which required single crystal search under inert conditions. All single crystals were directly taken from the respective reaction solutions, which were slowly cooled to  $-32\text{ }^{\circ}\text{C}$ . The compounds throughout tend to crystallize as small plates or long needles, showing a crystallization behavior to form multiple stacking layers. Thus, the compounds showed a pronounced tendency to form twinned structures. For each compound, we therefore tested a couple of different single crystals until good quality for a full subsequent measurement was achieved. For the compound  $\text{Ru}_2(\text{OBz-CF}_3)_4(\text{THF})_2$ , however, we were not able to improve the crystallization protocol in a way to achieve higher-quality crystals, showing less intergrowth behavior. We, nevertheless, were able to achieve a structure model of the paddlewheel complex by SC-XRD analysis, which showed sufficient quality for discussion of bond-lengths, angles etc. to be compared to the other complexes. For the sake of completeness and as further characterization detail, we here are providing the found structure model (crystal system, atom coordinates).

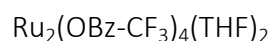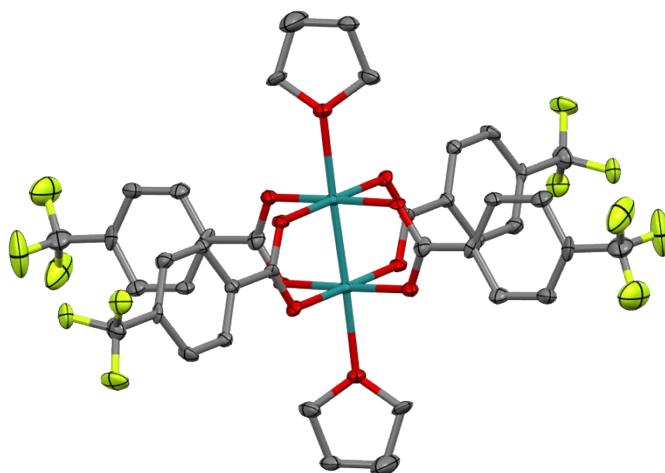

Figure S 4: ORTEP representation of  $\text{Ru}_2(\text{OBz-CF}_3)_4(\text{Me}_2\text{CO})_2$  with 50% probability level.

Table S 1: SC-XRD data of the complex  $\text{Ru}_2(\text{OBz-CF}_3)_4(\text{Me}_2\text{CO})_2$ .

| compound                    | $\text{Ru}_2(\text{OBz-CF}_3)_4(\text{Me}_2\text{CO})_2$       |
|-----------------------------|----------------------------------------------------------------|
| Formula                     | $\text{C}_{40}\text{H}_{32}\text{F}_6\text{O}_{10}\text{Ru}_2$ |
| Formula weight              | 1112.80                                                        |
| Temperature (K)             | 100(2)                                                         |
| Wavelength ( $\text{\AA}$ ) | 0.7103 (Mo- $\text{K}\alpha$ )                                 |

|                          |            |
|--------------------------|------------|
| Crystal system           | monoclinic |
| Space group              | C 1 2/c 1  |
| Z                        | 8          |
| a (Å)                    | 24.756(6)  |
| b (Å)                    | 14.090(3)  |
| c (Å)                    | 16.243(3)  |
| $\alpha$ (°)             | 90         |
| $\beta$ (°)              | 110.200(7) |
| $\gamma$ (°)             | 90         |
| Volume (Å <sup>3</sup> ) | 5317(2)    |

| Symbol | x/a         | y/b        | z/c        | U         |
|--------|-------------|------------|------------|-----------|
| Ru1    | 0.53315(2)  | 0.48847(5) | 0.56760(3) | 0.0141836 |
| F1     | 0.3338(3)   | -0.0114(6) | 0.6468(4)  | 0.072389  |
| F2     | 0.2741(3)   | 0.0049(6)  | 0.5197(3)  | 0.0734417 |
| F3     | 0.2671(3)   | 0.0914(6)  | 0.6233(4)  | 0.0783953 |
| F4     | 0.25209(19) | 0.8500(5)  | 0.6684(3)  | 0.0394186 |
| F5     | 0.32436(19) | 0.8656(4)  | 0.7884(3)  | 0.0351291 |
| F6     | 0.27172(17) | 0.7412(4)  | 0.7674(3)  | 0.0351291 |
| O1     | 0.48884(19) | 0.3710(5)  | 0.5830(3)  | 0.020146  |
| O2     | 0.42380(18) | 0.3908(4)  | 0.4491(2)  | 0.0171187 |
| O3     | 0.48374(19) | 0.5681(4)  | 0.6207(3)  | 0.0191009 |
| O4     | 0.4186(2)   | 0.5927(4)  | 0.4874(3)  | 0.0194071 |
| O5     | 0.6020(2)   | 0.4711(5)  | 0.7046(3)  | 0.0218944 |
| C1     | 0.3037(4)   | 0.0546(9)  | 0.5892(5)  | 0.0420945 |
| C2     | 0.3418(3)   | 0.1274(8)  | 0.5718(5)  | 0.0343539 |
| C3     | 0.3968(3)   | 0.1420(8)  | 0.6284(5)  | 0.0328046 |
| H3     | 0.41171     | 0.10435    | 0.67980    | 0.039     |
| C4     | 0.4300(3)   | 0.2102(7)  | 0.6109(4)  | 0.025048  |
| H4     | 0.46873     | 0.21784    | 0.64896    | 0.03      |
| C5     | 0.4078(3)   | 0.2701(6)  | 0.5368(4)  | 0.0200749 |
| C6     | 0.3522(3)   | 0.2553(7)  | 0.4792(4)  | 0.0230204 |
| H6     | 0.33732     | 0.29390    | 0.42831    | 0.027     |
| C7     | 0.3180(3)   | 0.1844(8)  | 0.4954(4)  | 0.0307509 |
| H7     | 0.27978     | 0.17423    | 0.45639    | 0.037     |
| C8     | 0.4431(3)   | 0.3502(7)  | 0.5224(4)  | 0.0228942 |
| C9     | 0.2953(4)   | 0.8053(8)  | 0.7260(5)  | 0.0328228 |
| C10    | 0.3335(3)   | 0.7524(6)  | 0.6859(4)  | 0.0180736 |
| C11    | 0.3809(3)   | 0.7068(7)  | 0.7378(4)  | 0.0241645 |
| H11    | 0.39064     | 0.70837    | 0.79974    | 0.029     |
| C12    | 0.4156(3)   | 0.6571(6)  | 0.7007(4)  | 0.0172297 |
| H12    | 0.44897     | 0.62434    | 0.73663    | 0.021     |

|      |           |            |           |           |
|------|-----------|------------|-----------|-----------|
| C13  | 0.4002(3) | 0.6566(6)  | 0.6096(4) | 0.0171747 |
| C14  | 0.3523(3) | 0.7031(6)  | 0.5577(4) | 0.0179712 |
| H14  | 0.34192   | 0.70035    | 0.49568   | 0.021     |
| C15  | 0.3184(3) | 0.7543(7)  | 0.5942(4) | 0.0219123 |
| H15  | 0.28606   | 0.78942    | 0.55847   | 0.021     |
| C16  | 0.4366(3) | 0.6013(6)  | 0.5693(4) | 0.0140649 |
| C17  | 0.5974(3) | 0.4089(7)  | 0.7713(4) | 0.0283364 |
| H17A | 0.58244   | 0.34613    | 0.74623   | 0.034     |
| H17B | 0.57110   | 0.43588    | 0.79938   | 0.034     |
| C18  | 0.6571(4) | 0.3999(11) | 0.8364(5) | 0.0667195 |
| H18A | 0.65737   | 0.41397    | 0.89624   | 0.08      |
| H18B | 0.67179   | 0.33473    | 0.83564   | 0.08      |
| C19  | 0.6933(3) | 0.4697(7)  | 0.8101(4) | 0.0304985 |
| H19A | 0.73270   | 0.44501    | 0.82191   | 0.037     |
| H19B | 0.69558   | 0.53089    | 0.84111   | 0.037     |
| C20  | 0.6615(3) | 0.4803(8)  | 0.7135(4) | 0.0342819 |
| H20A | 0.66914   | 0.54309    | 0.69241   | 0.041     |
| H20B | 0.67295   | 0.43010    | 0.68008   | 0.041     |

| Atom1 | Atom2 | Length   |
|-------|-------|----------|
| Ru1   | O1    | 2.048(7) |
| Ru1   | O3    | 2.056(6) |
| Ru1   | O5    | 2.302(4) |
| F1    | C1    | 1.35(1)  |
| F2    | C1    | 1.32(1)  |
| F3    | C1    | 1.32(1)  |
| F4    | C9    | 1.31(1)  |
| F5    | C9    | 1.33(1)  |
| F6    | C9    | 1.37(1)  |
| O1    | C8    | 1.252(7) |
| O2    | C8    | 1.257(8) |
| O3    | C16   | 1.267(8) |
| O4    | C16   | 1.254(8) |
| O5    | C17   | 1.43(1)  |
| O5    | C20   | 1.435(9) |
| C1    | C2    | 1.49(2)  |
| C2    | C3    | 1.370(9) |
| C2    | C7    | 1.42(1)  |
| C3    | H3    | 0.950    |
| C3    | C4    | 1.36(1)  |
| C4    | H4    | 0.951    |
| C4    | C5    | 1.42(1)  |
| C5    | C6    | 1.387(9) |
| C5    | C8    | 1.49(1)  |
| C6    | H6    | 0.951    |
| C6    | C7    | 1.39(1)  |
| C7    | H7    | 0.950    |
| C9    | C10   | 1.52(1)  |

|     |      |          |
|-----|------|----------|
| C10 | C11  | 1.35(1)  |
| C10 | C15  | 1.405(9) |
| C11 | H11  | 0.950    |
| C11 | C12  | 1.40(1)  |
| C12 | H12  | 0.950    |
| C12 | C13  | 1.395(9) |
| C13 | C14  | 1.362(9) |
| C13 | C16  | 1.50(1)  |
| C14 | H14  | 0.951    |
| C14 | C15  | 1.39(1)  |
| C15 | H15  | 0.950    |
| C17 | H17A | 0.990    |
| C17 | H17B | 0.991    |
| C17 | C18  | 1.50(1)  |
| C18 | H18A | 0.990    |
| C18 | H18B | 0.99     |
| C18 | C19  | 1.49(2)  |
| C19 | H19A | 0.990    |
| C19 | H19B | 0.990    |
| C19 | C20  | 1.500(8) |
| C20 | H20A | 0.99     |
| C20 | H20B | 0.99     |

---

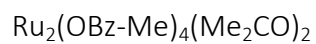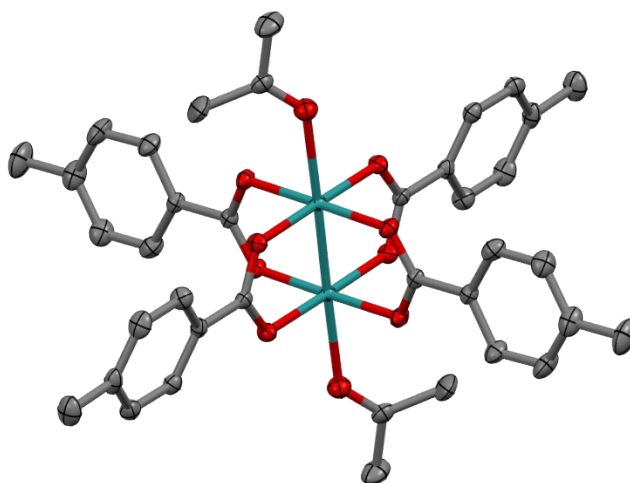

Figure S 5: ORTEP representation of  $\text{Ru}_2(\text{OBz-Me})_4(\text{Me}_2\text{CO})_2$  with 50% probability level.

Table S 2: SC-XRD data of the complex  $\text{Ru}_2(\text{OBz-Me})_4(\text{Me}_2\text{CO})_2$ .

| Compound        | $\text{Ru}_2(\text{OBz-Me})_4(\text{Me}_2\text{CO})_2$  |
|-----------------|---------------------------------------------------------|
| Formula         | $\text{C}_{38} \text{H}_{40} \text{O}_{10} \text{Ru}_2$ |
| CCDC            | 2043844                                                 |
| Formula weight  | 858.84                                                  |
| Temperature (K) | 100(2)                                                  |
| Wavelength (Å)  | 0.7103 (Mo- $\text{K}_\alpha$ )                         |
| Crystal system  | triclinic                                               |
| Space group     | P -1                                                    |
| Z               | 1                                                       |
| a (Å)           | 6.6721(13)                                              |
| b (Å)           | 11.701(2)                                               |
| c (Å)           | 12.113(2)                                               |
| $\alpha$ (°)    | 96.337(8)                                               |
| $\beta$ (°)     | 104.603(8)                                              |
| $\gamma$ (°)    | 103.407(8)                                              |



|                                              |                                            |
|----------------------------------------------|--------------------------------------------|
| Volume (Å <sup>3</sup> )                     | 875.7(3)                                   |
| μ (mm <sup>-1</sup> )                        | 0.921                                      |
| d <sub>calc</sub> (g/cm <sup>3</sup> )       | 1.629                                      |
| F (000)                                      | 436                                        |
| Crystal size (mm <sup>3</sup> )              | 0.045x 0.133 x 0.280                       |
| Theta range                                  | 2.30° to 25.35°                            |
| Index range                                  | -8 ≤ h ≤ 8<br>-14 ≤ k ≤ 14<br>-14 ≤ l ≤ 14 |
| Refl. collected                              | 34266                                      |
| Independent reflections                      | 3196 (R <sub>int</sub> = 0.1059)           |
| Data/restraints/parameters                   | 3195 / 0 / 230                             |
| GOF on F <sup>2</sup>                        | 1.034                                      |
| R <sub>1</sub> /wR <sub>2</sub> <sup>a</sup> | 0.0425 / 0.1172                            |
| [I ≥ 2σ(I)] <sup>b</sup>                     |                                            |
| R <sub>1</sub> /wR <sub>2</sub>              | 0.0487 / 0.1218                            |
| [all data]                                   |                                            |
| Largest diff. peak and hole                  | 1.642 and -0.757 eÅ <sup>-3</sup>          |

a:  $w = 1/[\sigma^2(F_o^2) + (0.0733P)^2 + 2.19991P]$  where  $P = (F_o^2 + 2F_c^2)/3$

b:  $R_1 = \sum ||F_o| - |F_c|| / \sum |F_o|$ ;  $wR_2 = \{ \sum [w(F_o^2 - F_c^2)^2] / \sum [w(F_o^2)^2] \}^{1/2}$

| Atom1 | Atom2 | Length   |
|-------|-------|----------|
| Ru1   | O1    | 2.056(3) |
| Ru1   | O3    | 2.047(4) |
| Ru1   | O5    | 2.350(4) |
| O1    | C1    | 1.274(5) |
| O2    | C1    | 1.247(6) |
| O3    | C9    | 1.256(5) |
| O4    | C9    | 1.271(6) |
| O5    | C18   | 1.205(6) |
| C1    | C2    | 1.475(7) |
| C2    | C3    | 1.387(7) |
| C2    | C7    | 1.380(6) |
| C3    | C4    | 1.373(7) |
| C3    | H3    | 0.950    |

|     |      |          |
|-----|------|----------|
| C4  | C5   | 1.390(8) |
| C4  | H4   | 0.950    |
| C5  | C6   | 1.392(7) |
| C5  | C8   | 1.495(7) |
| C6  | C7   | 1.376(7) |
| C6  | H6   | 0.951    |
| C7  | H7   | 0.950    |
| C8  | H8A  | 0.980    |
| C8  | H8B  | 0.980    |
| C8  | H8C  | 0.980    |
| C9  | C10  | 1.483(7) |
| C10 | C11  | 1.393(8) |
| C10 | C15  | 1.384(6) |
| C11 | C12  | 1.368(8) |
| C11 | H11  | 0.950    |
| C12 | C13  | 1.381(7) |
| C12 | H12  | 0.949    |
| C13 | C14  | 1.390(9) |
| C13 | C16  | 1.501(9) |
| C14 | C15  | 1.371(8) |
| C14 | H14  | 0.950    |
| C15 | H15  | 0.950    |
| C16 | H16A | 0.980    |
| C16 | H16B | 0.979    |
| C16 | H16C | 0.980    |
| C17 | C18  | 1.486(9) |
| C17 | H17A | 0.981    |
| C17 | H17B | 0.980    |
| C17 | H17C | 0.980    |
| C18 | C19  | 1.483(8) |
| C19 | H19A | 0.980    |
| C19 | H19B | 0.981    |
| C19 | H19C | 0.979    |

---

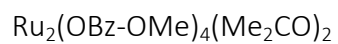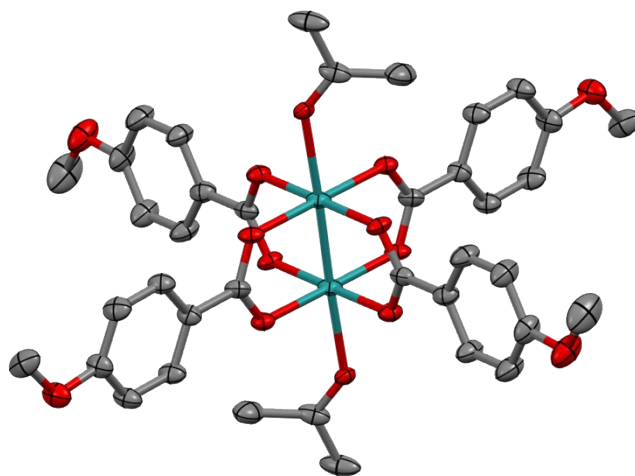

Figure S 6: ORTEP representation of  $\text{Ru}_2(\text{OBz-OMe})_4(\text{Me}_2\text{CO})_2$  with 50% probability level.

Table S 3: SC-XRD data of the complex  $\text{Ru}_2(\text{OBz-OMe})_4(\text{Me}_2\text{CO})_2$ .

| Compound        | $\text{Ru}_2(\text{OBz-OMe})_4(\text{Me}_2\text{CO})_2$ |
|-----------------|---------------------------------------------------------|
| Formula         | $\text{C}_{38} \text{H}_{40} \text{O}_{14} \text{Ru}_2$ |
| CCDC            | 2043845                                                 |
| Formula weight  | 922.84                                                  |
| Temperature (K) | 100(2)                                                  |
| Wavelength (Å)  | 0.7103 (Mo- $\text{K}_\alpha$ )                         |
| Crystal system  | monoclinic                                              |
| Space group     | C 1 2/c 1                                               |
| Z               | 4                                                       |
| a (Å)           | 24.3485(18)                                             |
| b (Å)           | 9.9212(7)                                               |
| c (Å)           | 23.6907(11)                                             |
| $\alpha$ (°)    | 90                                                      |
| $\beta$ (°)     | 117.401(2)                                              |
| $\gamma$ (°)    | 90                                                      |

|                                              |                                              |
|----------------------------------------------|----------------------------------------------|
| Volume (Å <sup>3</sup> )                     | 5080.8(6)                                    |
| μ (mm <sup>-1</sup> )                        | 0.645                                        |
| d <sub>calc</sub> (g/cm <sup>3</sup> )       | 1.206                                        |
| F (000)                                      | 1827                                         |
| Crystal size (mm <sup>3</sup> )              | 0.049 x 0.175 x 0.365                        |
| Theta range                                  | 2.26° to 25.35°                              |
| Index range                                  | -29 ≤ h ≤ 29<br>-11 ≤ k ≤ 11<br>-28 ≤ l ≤ 28 |
| Refl. collected                              | 101964                                       |
| Independent reflections                      | 4638 (R <sub>int</sub> = 0.0802)             |
| Data/restraints/parameters                   | 4638 / 0 / 244                               |
| GOF on F <sup>2</sup>                        | 1.197                                        |
| R <sub>1</sub> /wR <sub>2</sub> <sup>a</sup> | 0.0574 / 0.1190                              |
| [I ≥ 2σ(I)] <sup>b</sup>                     |                                              |
| R <sub>1</sub> /wR <sub>2</sub>              | 0.0690 / 0.1258                              |
| [all data]                                   |                                              |
| Largest diff. peak and hole                  | 1.366 and -1.107 eÅ <sup>-3</sup>            |

a:  $w = 1/[\sigma^2(F_o^2) + 71.3381P]$  where  $P = (F_o^2 + 2F_c^2)/3$   
b:  $R_1 = \sum ||F_o| - |F_c|| / \sum |F_o|$ ;  $wR_2 = \{ \sum [w(F_o^2 - F_c^2)^2] / \sum [w(F_o^2)^2] \}^{1/2}$

| Atom1 | Atom2 | Length   |
|-------|-------|----------|
| Ru1   | O1    | 2.057(4) |
| Ru1   | O4    | 2.047(4) |
| Ru1   | O7    | 2.342(3) |
| O1    | C1    | 1.266(6) |
| O2    | C1    | 1.280(8) |
| O3    | C5    | 1.359(8) |
| O3    | C8    | 1.434(7) |
| O4    | C9    | 1.264(8) |
| O5    | C9    | 1.275(6) |
| O6    | C13   | 1.352(9) |
| O6    | C16   | 1.416(8) |
| O7    | C18   | 1.218(6) |
| C1    | C2    | 1.479(8) |

|     |      |          |
|-----|------|----------|
| C2  | C3   | 1.394(8) |
| C2  | C7   | 1.397(9) |
| C3  | C4   | 1.38(1)  |
| C3  | H3   | 0.950    |
| C4  | C5   | 1.38(1)  |
| C4  | H4   | 0.950    |
| C5  | C6   | 1.391(8) |
| C6  | C7   | 1.38(1)  |
| C6  | H6   | 0.951    |
| C7  | H7   | 0.950    |
| C8  | H8A  | 0.981    |
| C8  | H8B  | 0.980    |
| C8  | H8C  | 0.979    |
| C9  | C10  | 1.49(1)  |
| C10 | C11  | 1.39(1)  |
| C10 | C15  | 1.394(8) |
| C11 | C12  | 1.38(1)  |
| C11 | H11  | 0.950    |
| C12 | C13  | 1.394(8) |
| C12 | H12  | 0.949    |
| C13 | C14  | 1.38(1)  |
| C14 | C15  | 1.36(1)  |
| C14 | H14  | 0.951    |
| C15 | H15  | 0.949    |
| C16 | H16A | 0.979    |
| C16 | H16B | 0.98     |
| C16 | H16C | 0.979    |
| C17 | C18  | 1.494(8) |
| C17 | H17A | 0.980    |
| C17 | H17B | 0.979    |
| C17 | H17C | 0.979    |
| C18 | C19  | 1.492(9) |
| C19 | H19A | 0.979    |
| C19 | H19B | 0.98     |
| C19 | H19C | 0.980    |

---

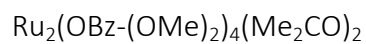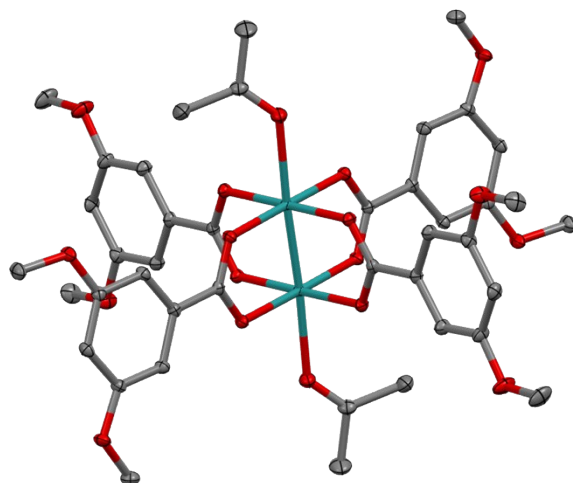

Figure S 7: ORTEP representation of  $\text{Ru}_2(\text{OBz}-(\text{OMe})_2)_4(\text{Me}_2\text{CO})_2$  with 50% probability level.

Table S 4: SC-XRD data of the complex  $\text{Ru}_2(\text{OBz}-(\text{OMe})_2)_4(\text{Me}_2\text{CO})_2$ .

| Compound                 | $\text{Ru}_2(\text{OBz}-(\text{OMe})_2)_4(\text{Me}_2\text{CO})_2$ |
|--------------------------|--------------------------------------------------------------------|
| Formula                  | $\text{C}_{48} \text{H}_{60} \text{O}_{20} \text{Ru}_2$            |
| CCDC                     | 2043847                                                            |
| Formula weight           | 1159.10                                                            |
| Temperature (K)          | 100(2)                                                             |
| Wavelength (Å)           | 0.7103 (Mo- $\text{K}_\alpha$ )                                    |
| Crystal system           | triclinic                                                          |
| Space group              | P -1                                                               |
| Z                        | 1                                                                  |
| a (Å)                    | 9.6301(5)                                                          |
| b (Å)                    | 11.2950(6)                                                         |
| c (Å)                    | 12.4945(6)                                                         |
| $\alpha$ (°)             | 99.576(2)                                                          |
| $\beta$ (°)              | 107.789(2)                                                         |
| $\gamma$ (°)             | 97.983(2)                                                          |
| Volume (Å <sup>3</sup> ) | 1249.72(11)                                                        |

|                                              |                                              |
|----------------------------------------------|----------------------------------------------|
| $\mu$ (mm <sup>-1</sup> )                    | 0.682                                        |
| $d_{\text{calc}}$ (g/cm <sup>3</sup> )       | 1.540                                        |
| F (000)                                      | 596                                          |
| Crystal size (mm <sup>3</sup> )              | 0.068 x 0.110 x 0.176                        |
| Theta range                                  | 2.26° to 30.56°                              |
| Index range                                  | -13 ≤ h ≤ 13<br>-16 ≤ k ≤ 16<br>-17 ≤ l ≤ 17 |
| Refl. collected                              | 7602                                         |
| Independent reflections                      | 7096 (R <sub>int</sub> = 0.0144)             |
| Data/restraints/parameters                   | 7602 / 6 / 334                               |
| GOF on F <sup>2</sup>                        | 1.037                                        |
| R <sub>1</sub> /wR <sub>2</sub> <sup>a</sup> | 0.0224 / 0.0544                              |
| [I ≥ 2σ(I)] <sup>b</sup>                     |                                              |
| R <sub>1</sub> /wR <sub>2</sub>              | 0.0198 / 0.0529                              |
| [all data]                                   |                                              |
| Largest diff. peak and hole                  | 0.071 and -0.894 eÅ <sup>-3</sup>            |

a:  $w = 1/[\sigma^2(F_o^2) + (0.0306P)^2 + 0.0689P]$  where  $P = (F_o^2 + 2F_c^2)/3$   
b:  $R_1 = \sum ||F_o| - |F_c|| / \sum |F_o|$  ;  $wR_2 = \{ \sum [w(F_o^2 - F_c^2)^2] / \sum [w(F_o^2)^2] \}^{1/2}$

| Atom1 | Atom2 | Length    |
|-------|-------|-----------|
| Ru1   | O1    | 2.0566(7) |
| Ru1   | O3    | 2.0645(9) |
| Ru1   | O5    | 2.335(1)  |
| O1    | C1    | 1.273(2)  |
| C1    | O2    | 1.267(1)  |
| C1    | C2    | 1.493(1)  |
| C2    | C3    | 1.394(2)  |
| C2    | C7    | 1.392(2)  |
| O3    | C10   | 1.267(2)  |
| C3    | H3    | 0.950     |
| C3    | C4    | 1.394(1)  |
| O4    | C10   | 1.271(2)  |
| C4    | C5    | 1.396(2)  |
| C4    | O7    | 1.366(2)  |
| O5    | C19   | 1.223(2)  |

|     |      |          |
|-----|------|----------|
| C5  | H5   | 0.950    |
| C5  | C6   | 1.396(2) |
| O6  | C6   | 1.365(2) |
| O6  | C8   | 1.427(1) |
| C6  | C7   | 1.387(1) |
| O7  | C9   | 1.426(1) |
| C7  | H7   | 0.950    |
| O8  | C15  | 1.363(2) |
| O8  | C18  | 1.432(2) |
| C8  | H8A  | 0.980    |
| C8  | H8AB | 0.980    |
| C8  | H8AC | 0.980    |
| O9  | C13  | 1.365(2) |
| O9  | C17  | 1.430(2) |
| C9  | H9A  | 0.980    |
| C9  | H9AB | 0.980    |
| C9  | H9AC | 0.980    |
| C10 | C11  | 1.493(2) |
| C11 | C12  | 1.402(2) |
| C11 | C16  | 1.385(2) |
| C12 | H12  | 0.950    |
| C12 | C13  | 1.388(2) |
| C13 | C14  | 1.402(2) |
| C14 | H14  | 0.950    |
| C14 | C15  | 1.388(2) |
| C15 | C16  | 1.400(2) |
| C16 | H16  | 0.950    |
| C17 | H17A | 0.980    |
| C17 | H17B | 0.980    |
| C17 | H17C | 0.980    |
| C18 | H18A | 0.980    |
| C18 | H18B | 0.980    |
| C18 | H18C | 0.980    |
| C19 | C20  | 1.493(2) |
| C19 | C21  | 1.498(2) |
| C20 | H20A | 0.980    |
| C20 | H20B | 0.980    |
| C20 | H20C | 0.980    |
| C21 | H21A | 0.980    |
| C21 | H21B | 0.980    |
| C21 | H21C | 0.980    |
| C22 | C23  | 1.503(4) |
| C22 | C24  | 1.473(3) |
| C22 | O10  | 1.255(4) |
| C23 | H23A | 0.980    |
| C23 | H23B | 0.980    |
| C23 | H23C | 0.980    |
| C24 | H24A | 0.980    |
| C24 | H24B | 0.980    |



C24
H24C
0.980

---

Ru<sub>2</sub>(OBz-F)<sub>4</sub>(Me<sub>2</sub>CO)<sub>2</sub>

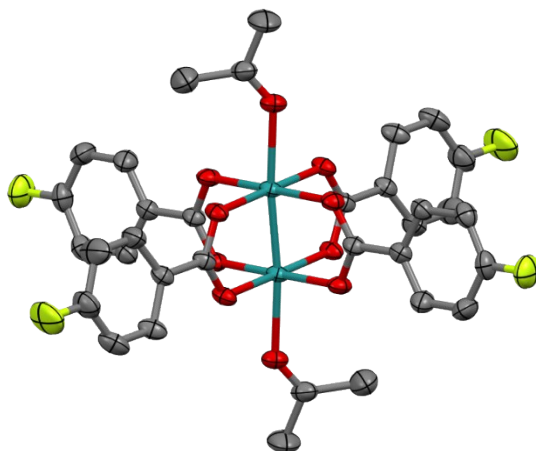

Figure S 8: ORTEP representation of Ru<sub>2</sub>(OBz-F)<sub>4</sub>(Me<sub>2</sub>CO)<sub>2</sub> with 50% probability level.

Table S 5: SC-XRD data of the complex Ru<sub>2</sub>(OBz-F)<sub>4</sub>(Me<sub>2</sub>CO)<sub>2</sub>.

| Compound                 | <b>Ru<sub>2</sub>(OBz-F)<sub>4</sub>(Me<sub>2</sub>CO)<sub>2</sub></b>         |
|--------------------------|--------------------------------------------------------------------------------|
| Formula                  | C <sub>34</sub> H <sub>28</sub> F <sub>4</sub> O <sub>10</sub> Ru <sub>2</sub> |
| CCDC                     | 2043846                                                                        |
| Formula weight           | 874.70                                                                         |
| Temperature (K)          | 100(2)                                                                         |
| Wavelength (Å)           | 0.7103 (Mo-K <sub>α</sub> )                                                    |
| Crystal system           | monoclinic                                                                     |
| Space group              | C 1 2/c 1                                                                      |
| Z                        | 8                                                                              |
| a (Å)                    | 29.179(10)                                                                     |
| b (Å)                    | 18.400(7)                                                                      |
| c (Å)                    | 17.212(6)                                                                      |
| α (°)                    | 90                                                                             |
| β (°)                    | 113.270(11)                                                                    |
| γ (°)                    | 90                                                                             |
| Volume (Å <sup>3</sup> ) | 8489.0(5)                                                                      |
| μ (mm <sup>-1</sup> )    | 0.775                                                                          |

|                                              |                                              |
|----------------------------------------------|----------------------------------------------|
| $d_{\text{calc}}$ (g/cm <sup>3</sup> )       | 1.639                                        |
| F (000)                                      | 3488                                         |
| Crystal size (mm <sup>3</sup> )              | 0.049 x 0.185 x 0.345                        |
| Theta range                                  | 2.21° to 25.35°                              |
| Index range                                  | -35 ≤ h ≤ 35<br>-22 ≤ k ≤ 22<br>-20 ≤ l ≤ 20 |
| Refl. collected                              | 131612                                       |
| Independent reflections                      | 7767 (R <sub>int</sub> = 0.0553)             |
| Data/restraints/parameters                   | 7767 / 0 / 422                               |
| GOF on F <sup>2</sup>                        | 1.139                                        |
| R <sub>1</sub> /wR <sub>2</sub> <sup>a</sup> | 0.0773 / 0.2202                              |
| [I ≥ 2σ(I)] <sup>b</sup>                     |                                              |
| R <sub>1</sub> /wR <sub>2</sub>              | 0.0843 / 0.2320                              |
| [all data]                                   |                                              |
| Largest diff. peak and hole                  | 2.592 and -2.341 eÅ <sup>-3</sup>            |

a:  $w = 1/[\sigma^2(F_o^2) + (0.1582P)^2 + 57.6731P]$  where  $P = (F_o^2 + 2F_c^2)/3$   
b:  $R_1 = \sum ||F_o| - |F_c|| / \sum |F_o|$  ;  $wR_2 = \{ \sum [w(F_o^2 - F_c^2)^2] / \sum [w(F_o^2)^2] \}^{1/2}$

| Atom1 | Atom2 | Length   |
|-------|-------|----------|
| Ru1   | O1    | 2.070(4) |
| Ru1   | O3    | 2.074(5) |
| Ru1   | O10   | 2.346(6) |
| F1    | C5    | 1.361(8) |
| F2    | C12   | 1.38(1)  |
| O1    | C1    | 1.269(7) |
| O2    | C1    | 1.279(8) |
| O3    | C8    | 1.276(9) |
| O4    | C8    | 1.266(8) |
| O10   | C32   | 1.216(9) |
| C1    | C2    | 1.477(7) |
| C2    | C3    | 1.388(9) |
| C2    | C7    | 1.40(1)  |
| C3    | C4    | 1.37(1)  |
| C3    | H3    | 0.950    |
| C4    | C5    | 1.39(1)  |
| C4    | H4    | 0.950    |

|      |      |          |
|------|------|----------|
| C5   | C6   | 1.37(1)  |
| C6   | C7   | 1.381(9) |
| C6   | H6   | 0.949    |
| C7   | H7   | 0.950    |
| C8   | C9   | 1.48(1)  |
| C9   | C10  | 1.39(2)  |
| C9   | C14  | 1.38(2)  |
| C10  | C11  | 1.40(2)  |
| C10  | H10  | 0.95     |
| C11  | C12  | 1.34(1)  |
| C11  | H11  | 0.95     |
| C12  | C13  | 1.40(2)  |
| C13  | C14  | 1.38(2)  |
| C13  | H13  | 0.95     |
| C14  | H14  | 0.95     |
| C32  | C33  | 1.50(1)  |
| C32  | C34  | 1.51(1)  |
| C33  | H33A | 0.980    |
| C33  | H33B | 0.982    |
| C33  | H33C | 0.978    |
| C34  | H34A | 0.98     |
| C34  | H34B | 0.98     |
| C34  | H34C | 0.981    |
| Ru02 | O5   | 2.069(4) |
| Ru02 | O7   | 2.076(6) |
| Ru02 | O9   | 2.316(4) |
| F3   | C19  | 1.371(9) |
| F4   | C26  | 1.36(1)  |
| O5   | C15  | 1.264(7) |
| O6   | C15  | 1.265(6) |
| O7   | C22  | 1.279(8) |
| O8   | C22  | 1.262(7) |
| O9   | C29  | 1.212(8) |
| C15  | C16  | 1.497(8) |
| C16  | C17  | 1.37(1)  |
| C16  | C21  | 1.410(9) |
| C17  | C18  | 1.40(1)  |
| C17  | H17  | 0.950    |
| C18  | C19  | 1.38(1)  |
| C18  | H18  | 0.949    |
| C19  | C20  | 1.36(1)  |
| C20  | C21  | 1.370(9) |
| C20  | H20  | 0.949    |
| C21  | H21  | 0.949    |
| C22  | C23  | 1.49(1)  |
| C23  | C24  | 1.391(9) |
| C23  | C28  | 1.37(1)  |
| C24  | C25  | 1.40(1)  |
| C24  | H24  | 0.950    |

|     |      |         |
|-----|------|---------|
| C25 | C26  | 1.38(1) |
| C25 | H25  | 0.950   |
| C26 | C27  | 1.37(1) |
| C27 | C28  | 1.40(1) |
| C27 | H27  | 0.951   |
| C28 | H28  | 0.951   |
| C29 | C30  | 1.53(1) |
| C29 | C31  | 1.48(1) |
| C30 | H30A | 0.98    |
| C30 | H30B | 0.98    |
| C30 | H30C | 0.98    |
| C31 | H31A | 0.98    |
| C31 | H31B | 0.98    |
| C31 | H31C | 0.98    |

---

## Structural Properties of Diruthenium Tetracarboxylates – Bond Lengths and Angles

Table S 6: Overview on selected bond lengths and angles found in diruthenium tetracarboxylates in literature and presented in this work. \*Always the angle <90° was selected, \*\*Average value (there are two Ru atoms in the asymmetric unit, belonging to two complexes).

| Equatorial carboxylate                       | Axial ligand                                           | $d_{\text{Ru-Ru}}$<br>[Å] | $d_{\text{Ru-O(eq)}}$<br>[Å]** | $d_{\text{Ru-L(ax)}}$<br>[Å] | $\omega_{\text{O(eq)-Ru-O(eq)}}$<br>[°]* | $\tau_{\text{Oeq-Ru-Ru-Oeq}}$<br>[°] | Ref.      |
|----------------------------------------------|--------------------------------------------------------|---------------------------|--------------------------------|------------------------------|------------------------------------------|--------------------------------------|-----------|
| <b>Univalent Ru<sup>II,III</sup> PWs</b>     |                                                        |                           |                                |                              |                                          |                                      |           |
| Acetate                                      | H <sub>2</sub> O                                       | 2.262                     | 2.068                          | 2.335                        | 87.75                                    | 1.18                                 | 2         |
| Acetate                                      | MeOH                                                   | 2.265                     | 2.073                          | 2.333                        | 89.65                                    | 0.21                                 | 5         |
| Trifluoroacetate                             | THF                                                    | 2.277                     | 2.074                          | 2.268                        | 87.69                                    | 0.16                                 | 6         |
| Propionate                                   | Acetone                                                | 2.2595                    | 2.0675                         | 1.363                        | 89.74                                    | 0.40                                 | 2         |
| Benzoate                                     | Benzoic acid                                           | 2.2634                    | 2.0535                         | 2.356                        | 89.65                                    | 0.53                                 | 7         |
| Benzoate                                     | Acetone                                                | 2.2608                    | 2.0650                         | 2.3467                       | 98.66                                    | 3.92                                 | 5         |
| Benzoate                                     | THF                                                    | 2.2667                    | 2.0585                         | 2.353                        | 87.61                                    | 0.59                                 | 8         |
| 4-fluoro benzoate                            | Acetone                                                | 2.2698**                  | 2.0698                         | 2.3317**                     | 89.31                                    | 0.55                                 | This work |
| 4-fluoro benzoate                            | THF                                                    | 2.2677                    | 2.061                          | 2.354                        | 89.80                                    | 0.85                                 | 9         |
| 3,5-difluoro benzoate                        | THF                                                    | 2.2708                    | 2.073                          | 2.310                        | 88.58                                    | 0.59                                 | 9         |
| 2,4,6-trifluoro benzoate                     | THF                                                    | 2.2723                    | 2.071                          | 2.283                        | 89.42                                    | 0.25                                 | 9         |
| 4-trifluoro-methyl benzoate                  | THF                                                    | 2.2656                    | 2.0610                         | 2.3019                       | 89.04                                    | 0.82                                 | This work |
| 4-trifluoro-methyl benzoate                  | THF (THF solvate)                                      | 2.2662                    | 2.065                          | 2.298                        | 88.72                                    | 0.30                                 | 10        |
| 4-methoxy benzoate                           | Acetone                                                | 2.2687                    | 2.0558                         | 2.3415                       | 89.29                                    | 0.24                                 | This work |
| 3,5-dimethoxy benzoate                       | Acetone                                                | 2.2679                    | 2.0628                         | 2.3342                       | 89.43                                    | 0.49                                 | This work |
| 4-methyl benzoate                            | Acetone                                                | 2.2585                    | 2.0550                         | 2.3503                       | 89.73                                    | 0.37                                 | This work |
| <b>Mixed-valence Ru<sup>II,III</sup> PWs</b> |                                                        |                           |                                |                              |                                          |                                      |           |
| Acetate                                      | Chloride                                               | 2.2800                    | 2.0229                         | 2.5722                       | 89.50                                    | 0.58                                 | 11        |
| Acetate                                      | Pyridine (PF <sub>6</sub> <sup>-</sup> anion)          | 2.2805                    | 2.03                           | 2.27                         | 89.19                                    | 1.65                                 | 12        |
| Acetate                                      | 4-methyl Pyridine (PF <sub>6</sub> <sup>-</sup> anion) | 2.2786                    | 2.019                          | 2.291                        | 88.76                                    | 0.43                                 | 12        |
| Acetate                                      | Quinuclidine (PF <sub>6</sub> <sup>-</sup> anion)      | 2.2918                    | 2.025                          | 2.338                        | 88.72                                    | 0.83                                 | 12        |

## Additional Information – Ligand Exchange Test Reaction

To systematically unveil ligand exchange properties of the obtained series of diruthenium tetrabenzoate derivatives, we conducted additional NMR-based ligand exchange reactions. Best mimicking the properties of BTC with electron withdrawing groups in meta position but being chemically inert, we selected 3,5-bis(trifluoromethyl) benzoic acid as competing ligand (coligand) for this test reaction. In Figure S 9, initial ligand exchange rates (black circles) and the found equilibrium constants (grey squares) are displayed as a function of the respective ligand  $pK_a$ . Details on procedure and data evaluation are provided in the ESI. Although not in a very strict order, a general trend towards lower exchange rates for more acidic precursor ligands can be extracted. It remains unclear why OBz-Me has a comparably low rate. Overall, exchange rates between 1 and 8  $h^{-1}$  (at ambient temperature) confirm the slow ligand exchange kinetics for PGM-PW complexes. Equilibrium constants were extracted from the ratio of free precursor acid to the acid of the coligand after thermodynamic equilibration for 120 min at 55 °C. Entropic contribution is not to be expected for such a stoichiometric exchange reaction. A general correlation can be seen. Following chemical intuition, rather basic ligands are substituted preferentially as they tend to be protonated upon their dissociation and thus, are partially removed from the equilibrium.

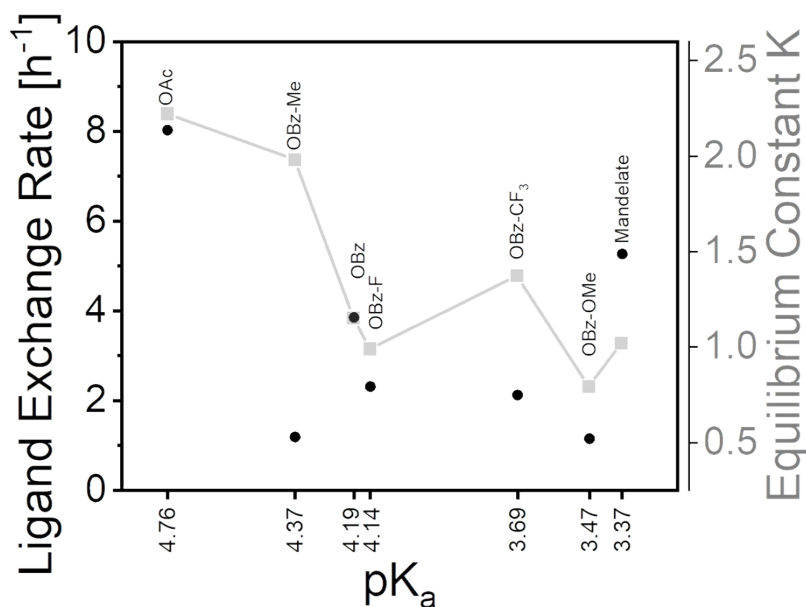

Figure S 9: Correlation between the ligand exchange rate (black circular data points), the equilibrium constant K (grey square data points) and the respective precursor ligand acidity ( $pK_a$ ). The ligand exchange was performed with 3,5-bis(trifluoromethyl) benzoic acid as monofunctional BTC simulant. Ligand exchange rates were determined using the maximum initial slopes at ambient temperature. Equilibrium constants are determined using the ratio of released precursors ligand to free coligand (equimolar feed) upon equilibration at 55 °C.

Generally, the ligand exchange is controlled by the acidity of the respective carboxylic acids. Although more basic ligands form stronger bonds to the metal rendering them more difficult to dissociate, their basicity prevents them from reversible coordination as their protonation occurs upon release. On the contrary, more acidic ligands are preferentially deprotonated but might form relatively weak coordination bonds to the metal. Due to these competing effects, a final decision on the ideal MOF precursor on the basis of this NMR-based simulating experiment is not substantiated but requires the experimental MOF syntheses and careful analysis of the respective materials as outlined in the following. However, the two samples OBz and mandelate seem to have higher ligand exchange rates compared to the other investigated benzoate ligands.

As follows, Figure S 10 shows an exemplary NMR spectrum how the calculation of kinetic and thermodynamic data was extracted from the primary data. Figure S 11 gives an impression on the

evolution of related NMR spectra throughout the experiment exemplified by  $\text{Ru}_2(\text{OBz})_4$ . Figure S 12 summarizes the evolution of the ratio of free precursor ligand to coligand for the whole series of diruthenium benzoate precursors.

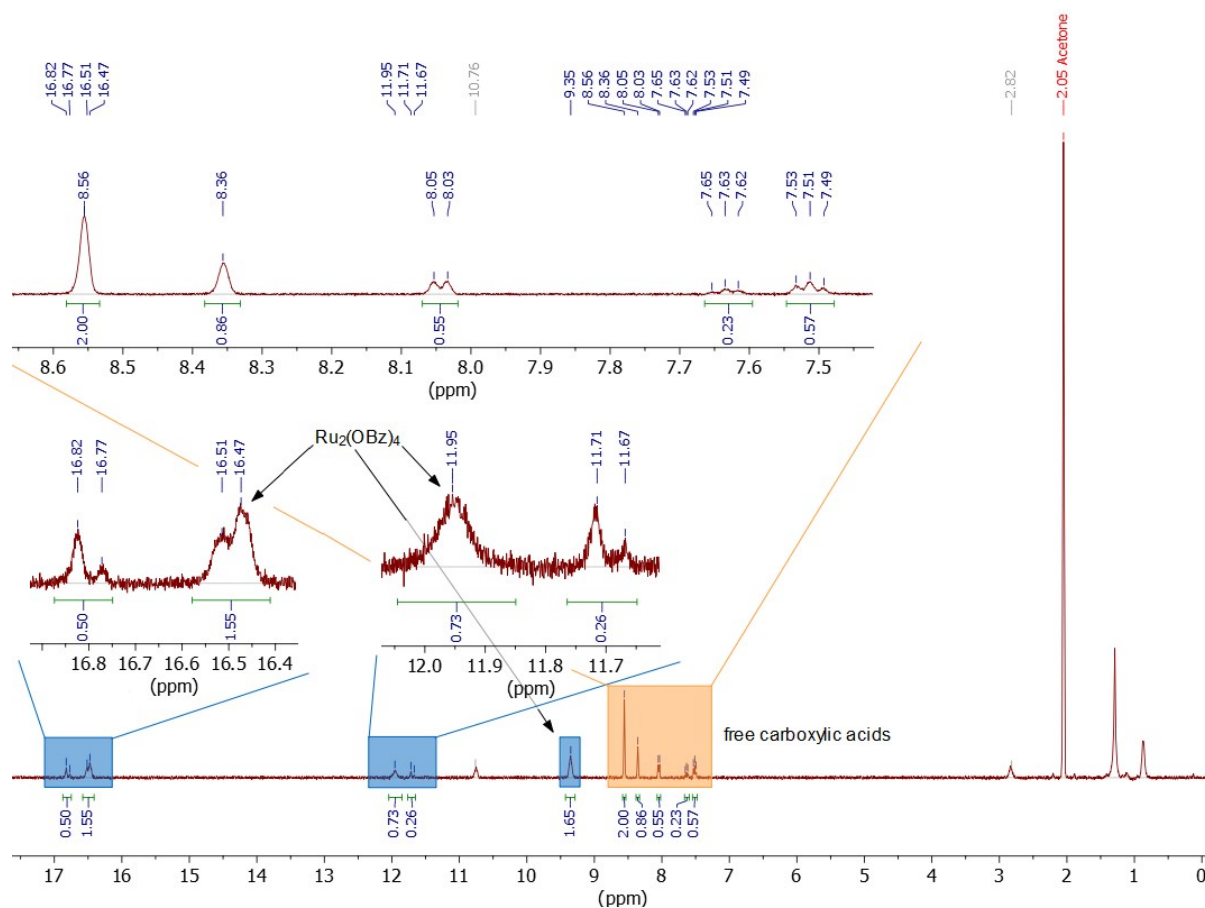

Figure S 10: Exemplary  $^1\text{H}$ -NMR spectrum of the ligand exchange reaction with  $\text{Ru}_2(\text{OBz})_4$  and 3,5-bis(trifluoromethyl) benzoic acid as competitive coligand after 6min 27s at ambient temperature. The signals of ligands bound to complexes are highlighted with blue, the region of free acids is highlighted in orange. Equilibrium konstants were determined using the ratios of the free acids as paramagnetism of the diruthenium core obstructs quantification of bound ligands.

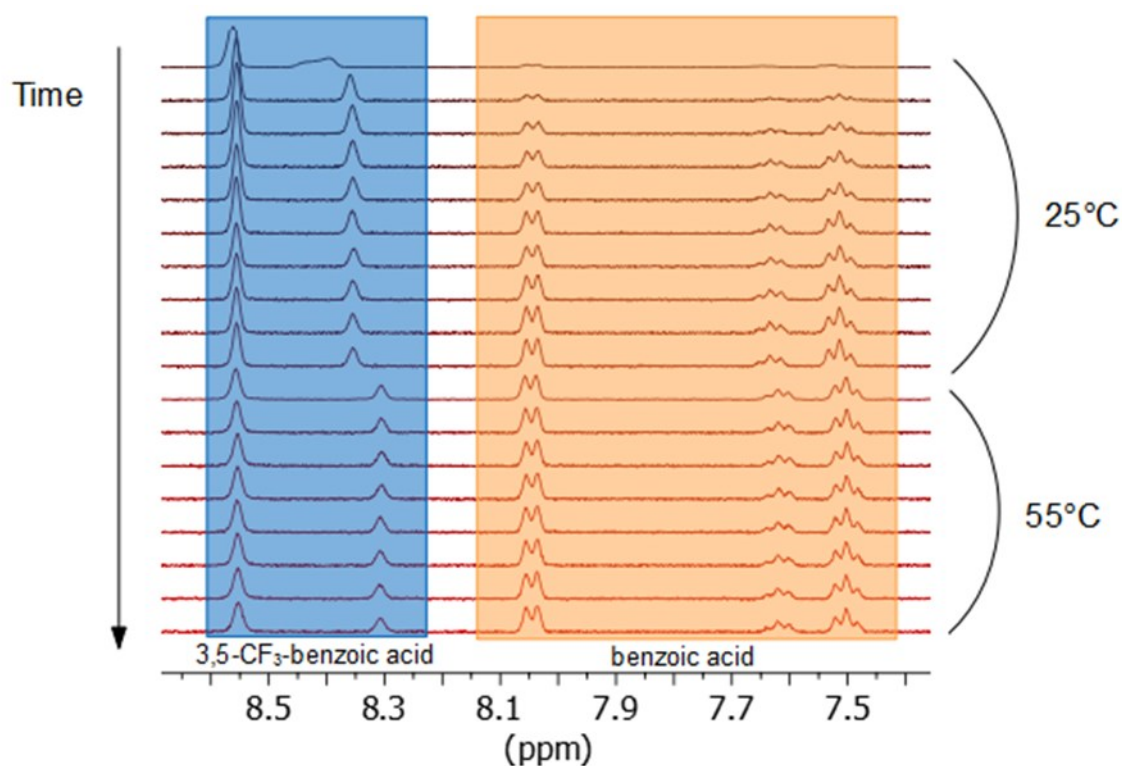



Figure S 11: Stacked  $^1\text{H-NMR}$  spectra of the kinetic series recorded for  $\text{Ru}_2(\text{OBz})_4$  as example.

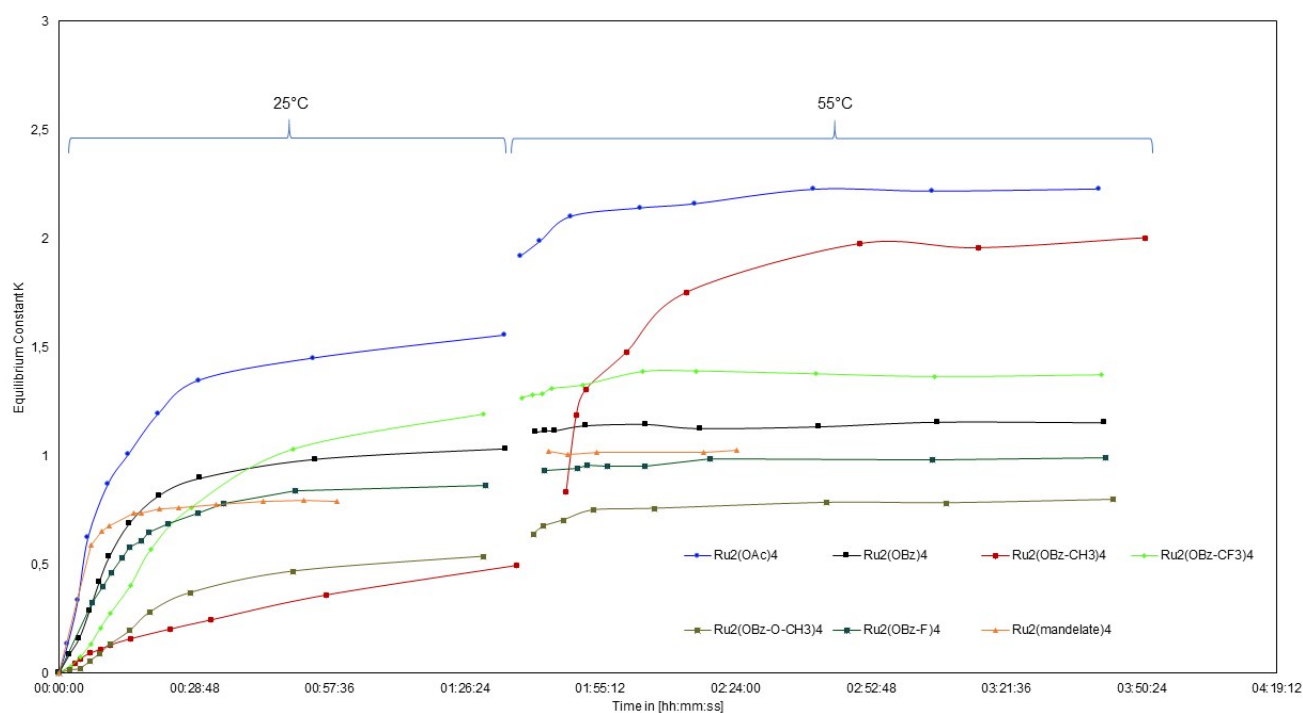

Figure S 12: Evolution of the ligand exchange reaction between precursor complexes and 3,5-bis(trifluoromethyl) benzoic acid as monotopic BTC simulat. The graphs display the ratio of the released precursor ligand to free coligand as a function of time. The gap at 1:30 h between the curves represents the transition from r.t. to 55 °C. Horizontal plateaus of the curves indicate reached equilibria. The steepest slopes in the beginning of the reactions were taken to calculate the exchange rates.

## Additional Information – MOF Characterization

### Development of a Modified MOF Synthesis Procedure

On the basis of the established Ru-HKUST-1 synthesis procedure utilizing  $\text{Ru}_2(\text{OAc})_4$  precursor and HOAc modulator, we developed a modified procedure to account for the different solubility of benzoate-derived precursors and benzoic acid derivatives as modulator. In contrast to the acetic acid, any solubilizing effect and function as cosolvent enhancing  $\text{H}_3\text{BTC}$  dissolution is absent for benzoic acids. Thus, we investigated the suitability of a water acetone mixture for MOF syntheses.

The following Table S 7 summarizes the outcome of MOF syntheses dedicated to extract the ideal synthetic procedure for this study. In each reaction, 158 mg  $\text{Ru}_2(\text{OAc})_4$  precursor and 101 mg  $\text{H}_3\text{BTC}$  were dissolved in the stated solvent / modulator mixture and heated to 150 °C over 3 d. Test reactions A, B and C yielded crystalline powders featuring the HKUST-1 structure, while reaction D resulted in an amorphous gel. Respective PXRD patterns are provided in Figure S 13. To avoid gel formation and to minimize the modulator loading, we selected the conditions of test reaction C for the study. For reasons of comprehensiveness, test reaction B was included in the results section of the main manuscript denoted as “OAc (x2 Mod)”.

Table S 7: Solvent amounts used to extract the ideal MOF synthesis conditions for this study. For each reaction, 158 mg  $\text{Ru}_2(\text{OAc})_4$  precursor and 101 mg  $\text{H}_3\text{BTC}$  were dissolved in the stated solvent / modulator mixture and heated to 150 °C for 3 d. \*related PXRD patterns are displayed in Figure S 13 below.

| Test reaction | $\text{H}_2\text{O}$ [mL] | $\text{Me}_2\text{CO}$ [mL] | HOAc [mL] | Outcome             |
|---------------|---------------------------|-----------------------------|-----------|---------------------|
| A             | 2                         | 2                           | 0.7       | Crystalline powder* |
| B             | 4                         | 4                           | 1.4       | Crystalline powder* |
| C             | 4                         | 4                           | 0.7       | Crystalline powder* |
| D             | 4                         | 4                           | 0.3       | Amorphous gel       |

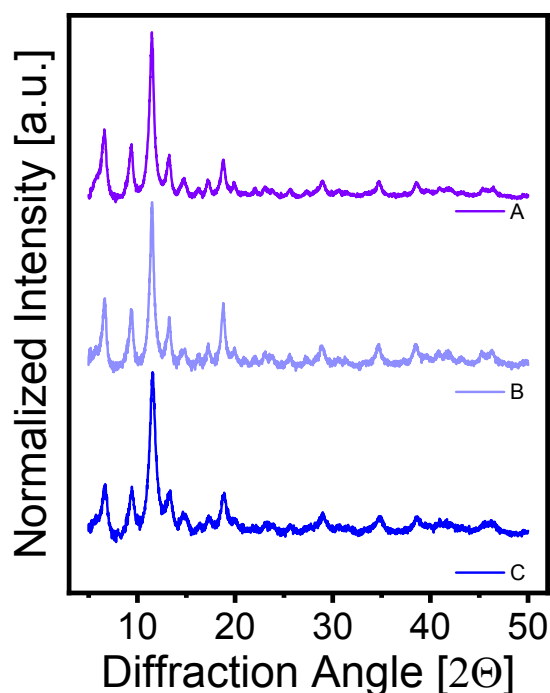

Figure S 13: Comparison of PXRD patterns for the MOF synthesis optimisation following test reactions A, B and C. All three patterns indicate crystalline and phase pure MOF materials.

## MOF Synthesis Details

Table S 8: Used reagent amounts for the synthesis of Ru-HKUST-1 samples. All syntheses using 4 mL water and 4 mL acetone were performed under inert conditions in steel autoclaves with Teflon liners at 150 °C over 3 days.

| MOF sample          | Precursor (Ru <sub>2</sub> R <sub>4</sub> ) |           |    | Linker H <sub>3</sub> BTC          |           |    | Modulator            |           |     |
|---------------------|---------------------------------------------|-----------|----|------------------------------------|-----------|----|----------------------|-----------|-----|
|                     | Molar weight [gmol <sup>-1</sup> ]          | Mass [mg] | Eq | Molar weight [gmol <sup>-1</sup> ] | Mass [mg] | Eq | Species              | Mass [mg] | Eq  |
| OAc                 | 438.32                                      | 158.0     | 3  | 210.14                             | 101       | 4  | HOAc                 | 735       | 102 |
| OAc (x2mod)         | 438.32                                      | 158.0     | 3  | 210.14                             | 101       | 4  | HOAc                 | 1470      | 204 |
| OBz                 | 686.60                                      | 247.5     | 3  | 210.14                             | 101       | 4  | HOBz                 | 1490      | 102 |
| OBz-F               | 758.56                                      | 273.1     | 3  | 210.14                             | 101       | 4  | HOBz-F               | 1710      | 102 |
| OBz-CF <sub>3</sub> | 958.59                                      | 345.1     | 3  | 210.14                             | 101       | 4  | HOBz-CF <sub>3</sub> | 2320      | 102 |
| OBz-Me              | 742.71                                      | 267.4     | 3  | 210.14                             | 101       | 4  | HOBz-Me              | 1660      | 102 |
| OBz-OMe             | 806.70                                      | 290.4     | 3  | 210.14                             | 101       | 4  | HOBz-OMe             | 1860      | 102 |
| L-mandelate         | 806.70                                      | 290.4     | 3  | 210.14                             | 101       | 4  | L-mandelic acid      | 1860      | 102 |

## Sample Appearance

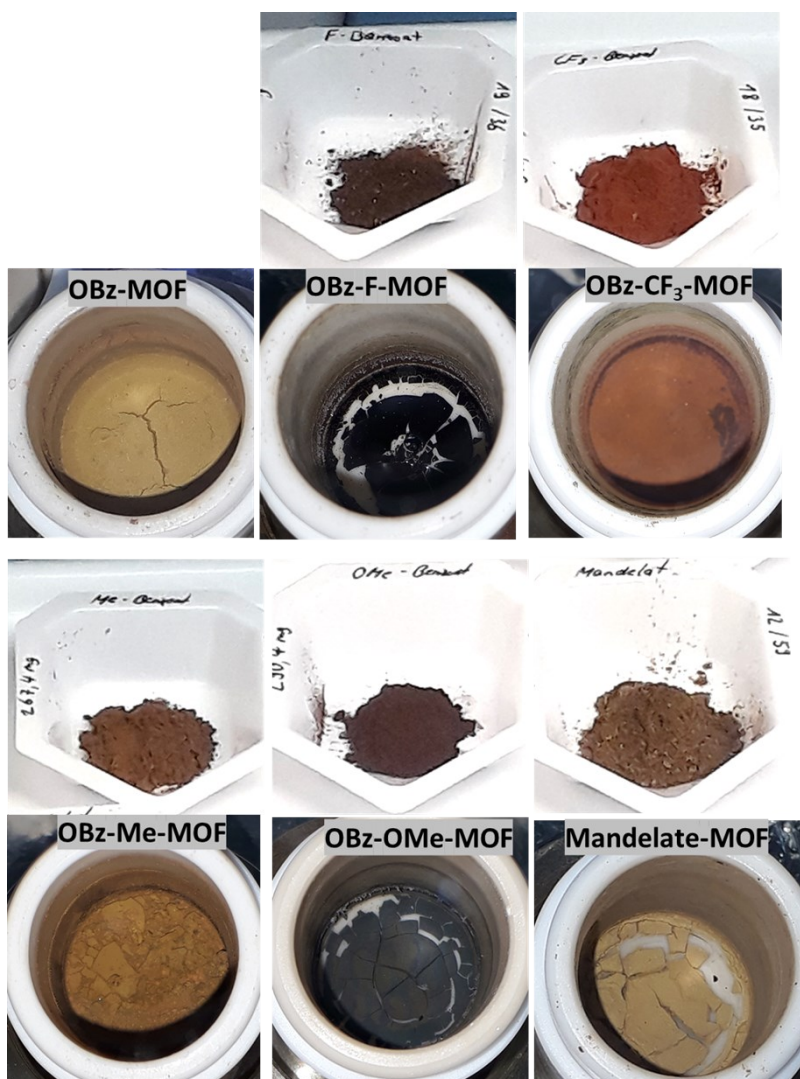

Figure S 14: Similarity of color shade between precursor complex and derived activated MOF.

Powder X-Ray Diffraction

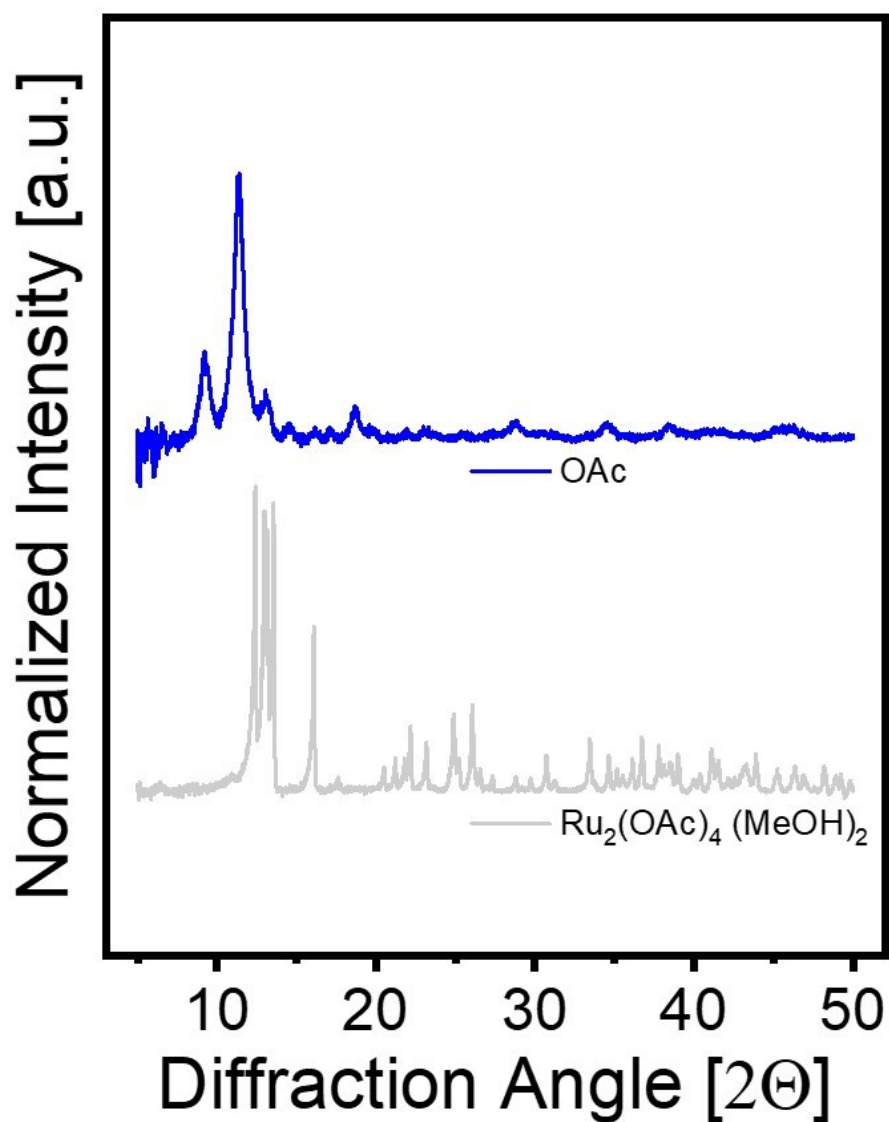

Figure S 15: PXRD comparison of Ru-HKUST-1 (top trace, blue) with its acetate precursor (bottom trace, light grey). Note that the crystalline precursor adduct was desolvated prior to use in MOF syntheses.

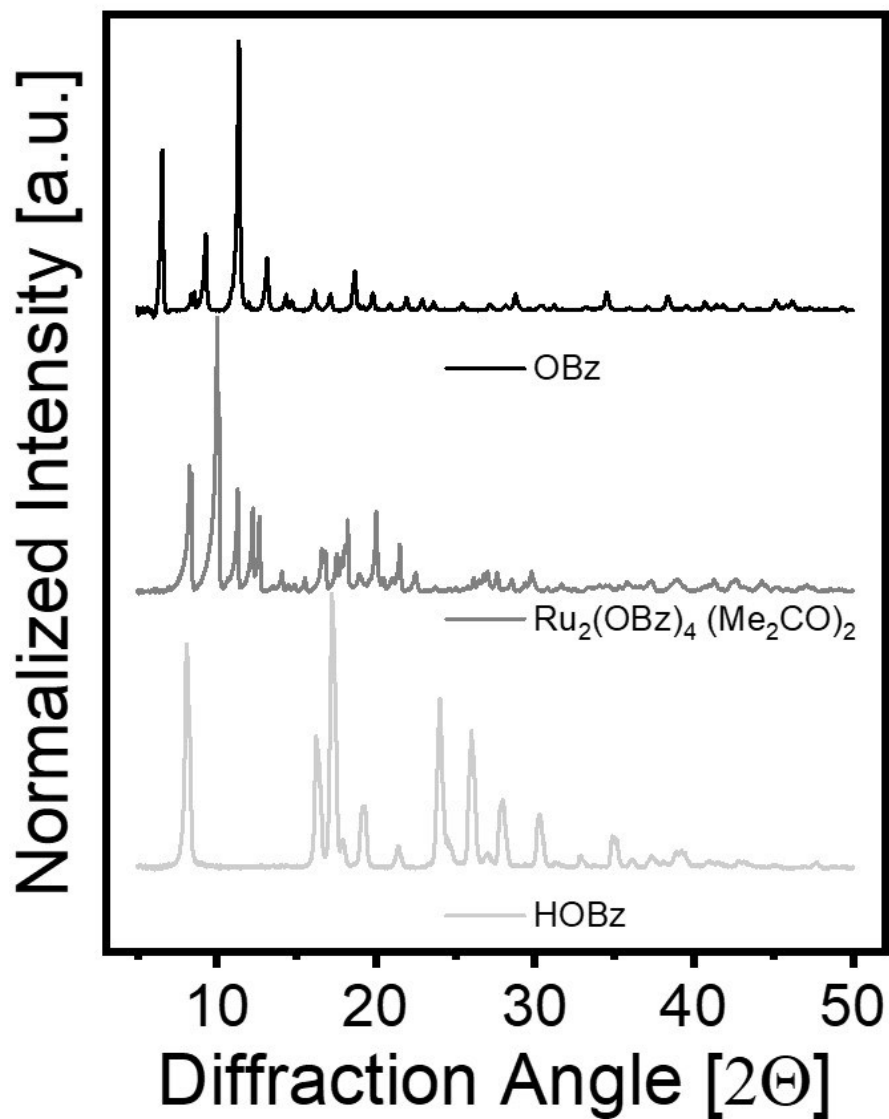

Figure S 16: PXRD comparison of Ru-HKUST-1 (top trace, black) with its benzoate precursor (middle trace, dark grey) and the used free acid modulator (bottom trace, light grey). Note that the crystalline precursor adduct was desolvated prior to use in MOF syntheses.

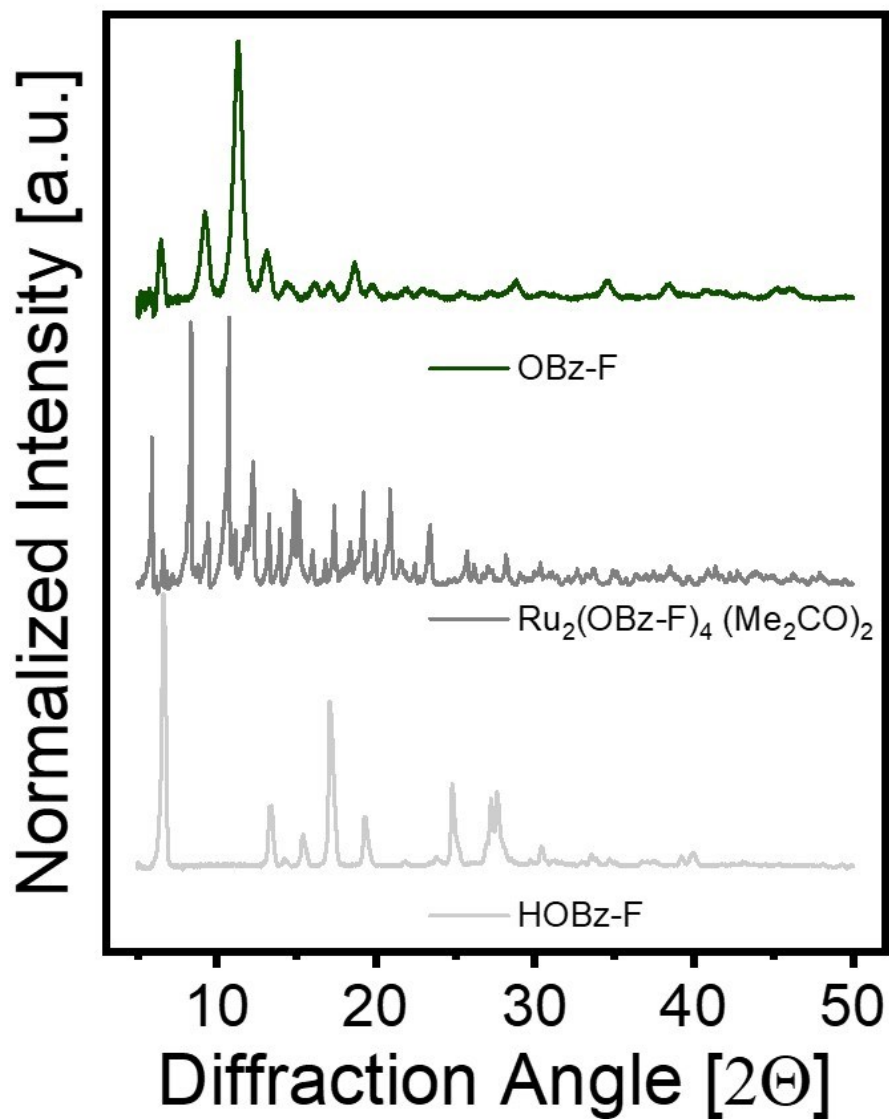

Figure S 17: PXR D comparison of Ru-HKUST-1 (top trace, emerald) with its 4-fluoro benzoate precursor (middle trace, dark grey) and the used free acid modulator (bottom trace, light grey). Note that the crystalline precursor adduct was desolvated prior to use in MOF syntheses.

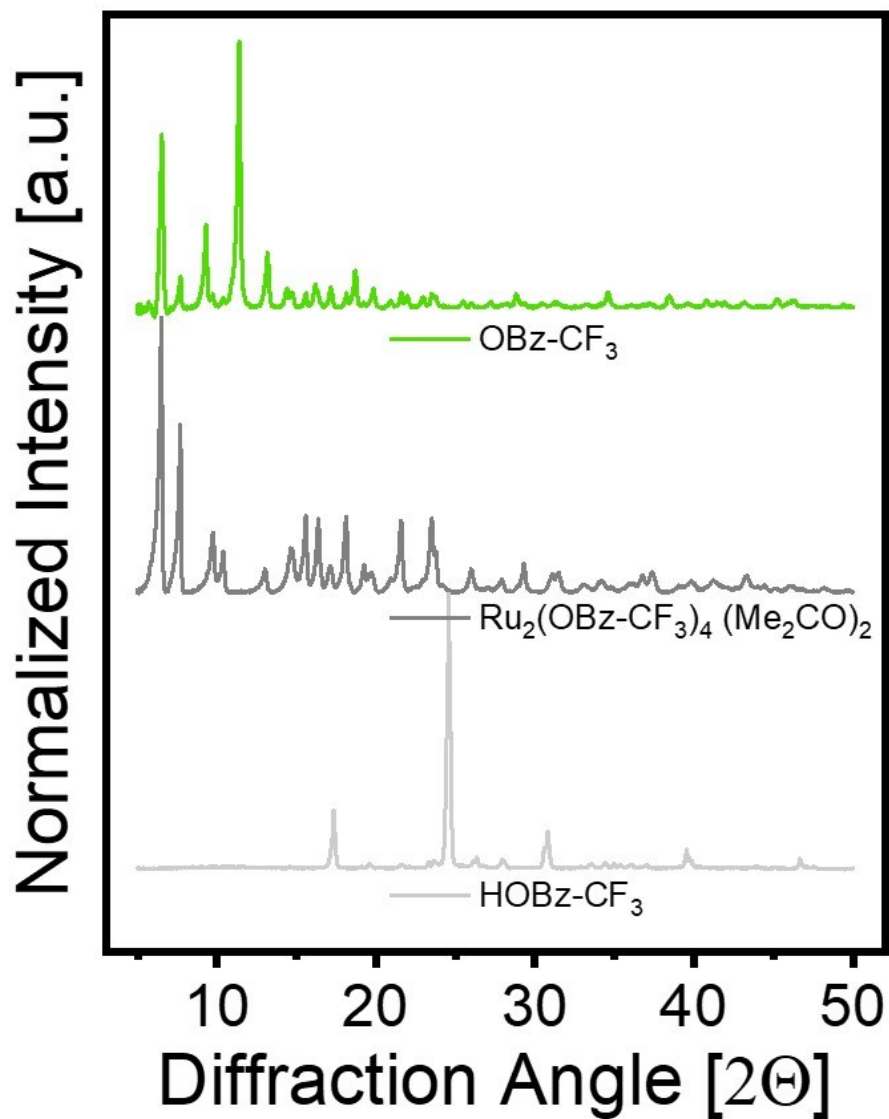

Figure S 18: PXRD comparison of Ru-HKUST-1 (top trace, green) with its 4-trifluoromethyl benzoate precursor (middle trace, dark grey) and the used free acid modulator (bottom trace, light grey). Note that the crystalline precursor adduct was desolvated prior to use in MOF syntheses.

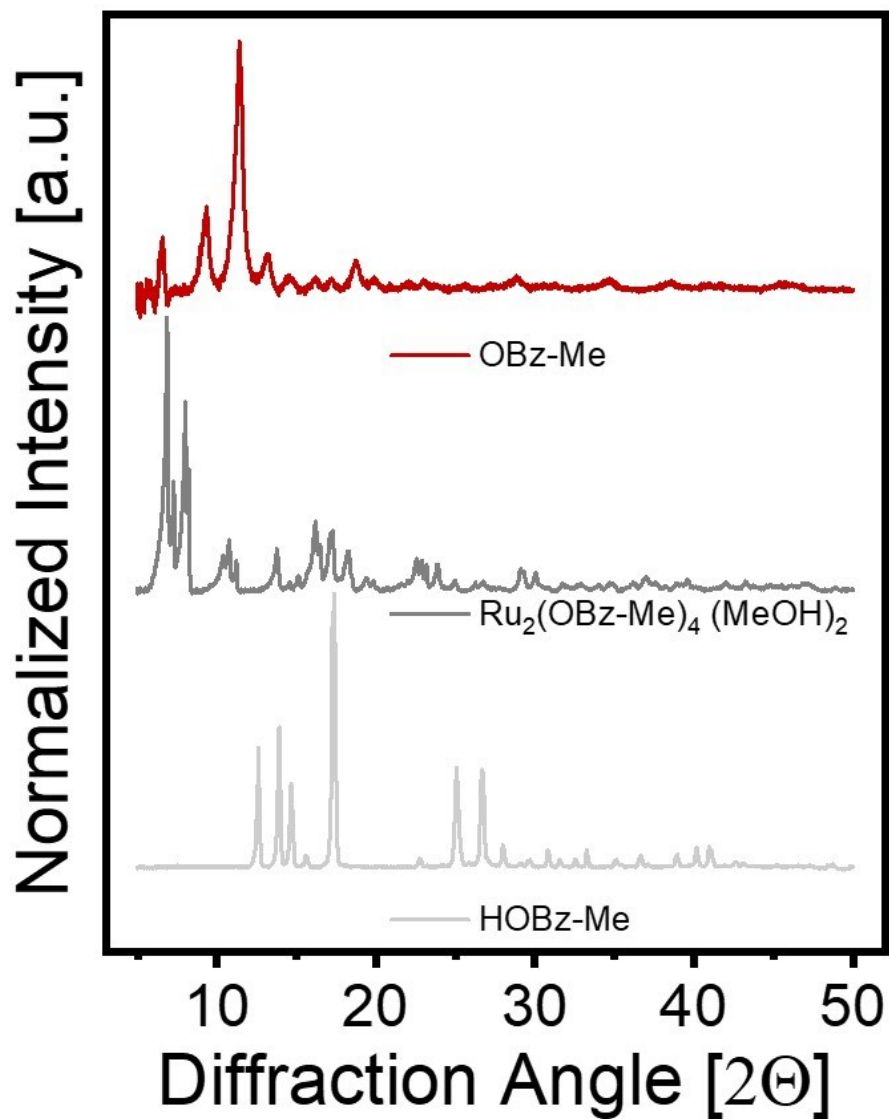

Figure S 19: PXRD comparison of Ru-HKUST-1 (top trace, red) with its 4-methyl benzoate precursor (middle trace, dark grey) and the used free acid modulator (bottom trace, light grey). Note that the crystalline precursor adduct was desolvated prior to use in MOF syntheses.



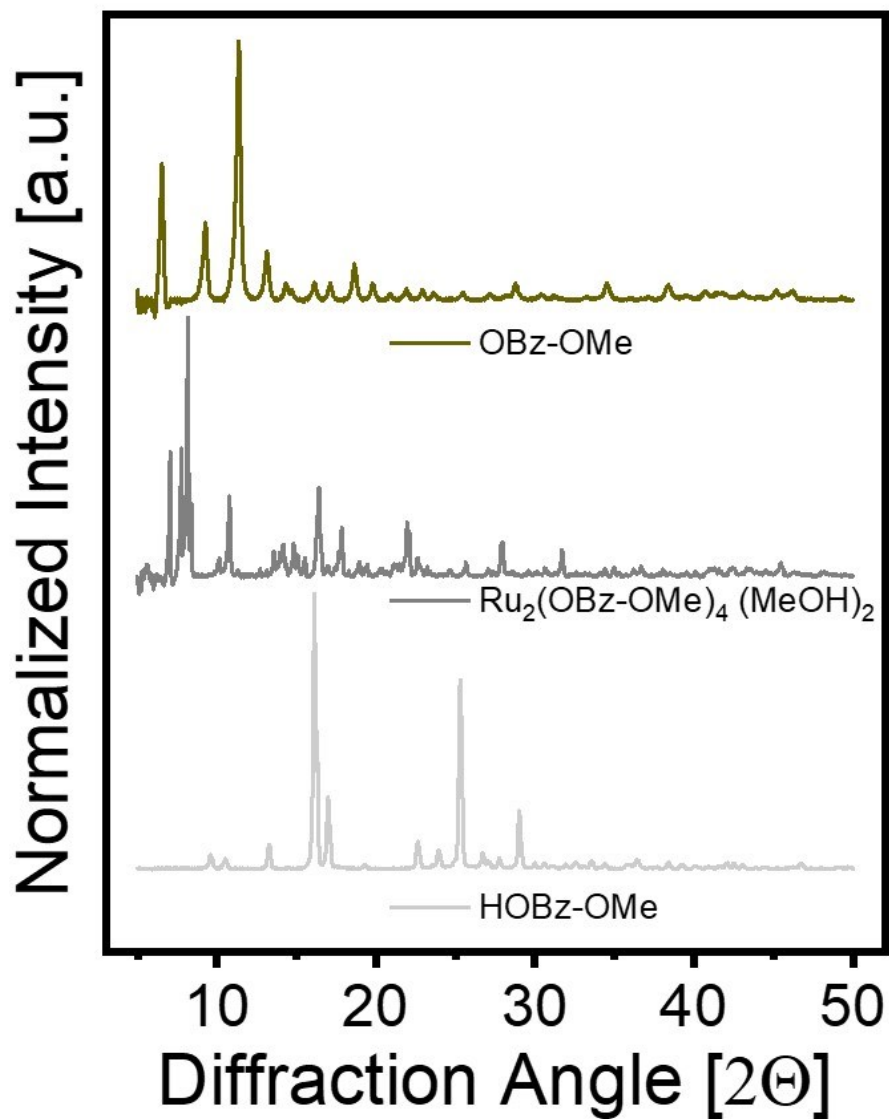

Figure S 20: PXRD comparison of Ru-HKUST-1 (top trace, olive) with its 4-methoxy benzoate precursor (middle trace, dark grey) and the used free acid modulator (bottom trace, light grey). Note that the crystalline precursor adduct was desolvated prior to use in MOF syntheses.

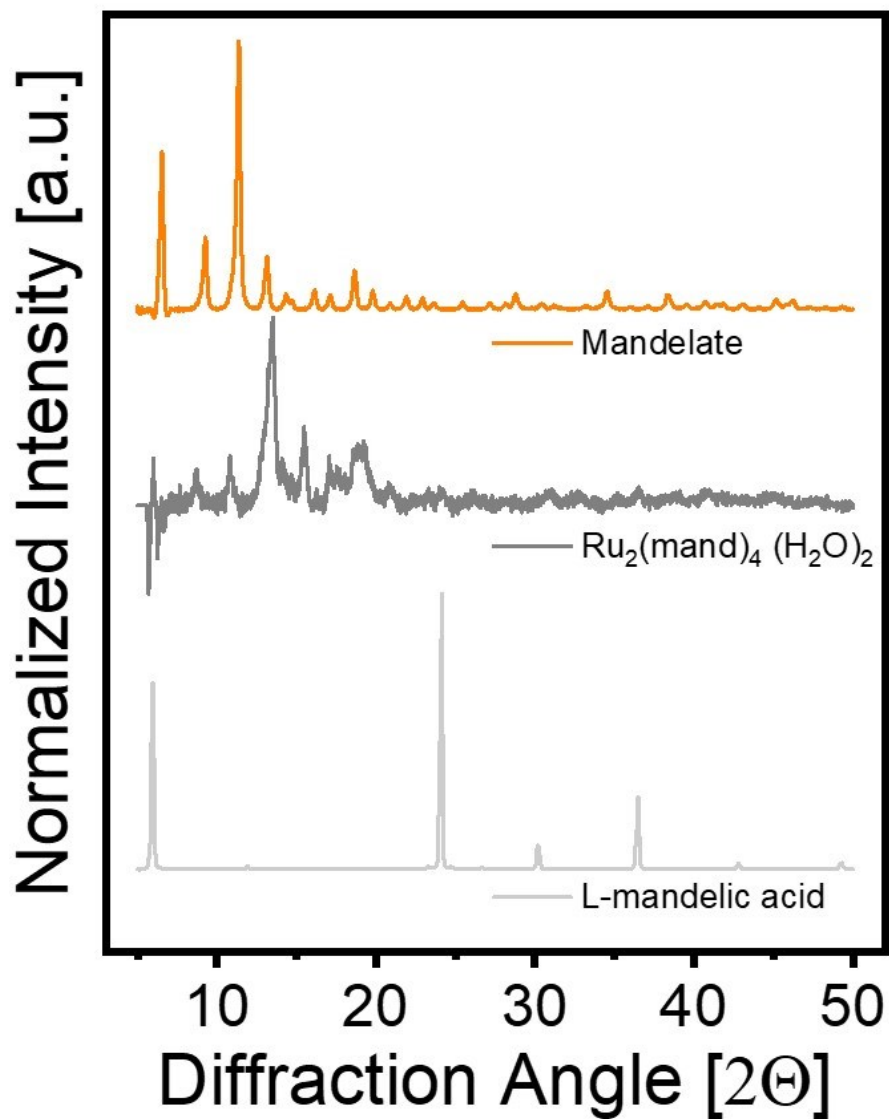

Figure S 21: PXRD comparison of Ru-HKUST-1 (top trace, orange) with its L-mandelate precursor (middle trace, dark grey) and the used free acid modulator (bottom trace, light grey). Note that the crystalline precursor adduct was desolvated prior to use in MOF syntheses.

## Composition & Porosity

C and H elemental analysis was combined with Ru contents derived from TGA-based metal oxide residues and Ru:F ratios obtained from EDS analysis. The residual unknown elemental content is assigned to oxygen assumed as the only missing elemental component. A summary of all elemental contents together with the theoretical values of an ideal  $[\text{Ru}_3(\text{BTC})_2]$  structure is shown in Table S 9. Solver-derived sum formulae putatively describing the found experimental values are provided with several assumptions: Neither oxides, nor hydroxides, nor fluorides were considered as additional counterions. All calculations were limited to  $\text{BTC}^{3-}$ ,  $\text{RCOO}^-$  and  $\text{H}^+$  with R being characteristic for each modulator/precursor ligand. No localisation of calculated protons to any counterions is possible from the obtained data, thus  $\text{H}^+$  are involved in the sum formulae independently. Note, that the sum of organic charges (involving  $\text{BTC}^{3-}$ ,  $\text{RCOO}^-$  and  $\text{H}^+$ ) was set to be  $\geq -6$ . This condition is based on the assumed  $\text{Ru}^{\text{II,III}}$  sites and potential presence of  $\text{Ru}^0$ -NPs in some samples. Each sum formula was set to three Ru atoms per repeating unit.

*Table S 9: Summary of compositions of all samples. The experimentally determined elemental C, H, F and Ru contents served for a solver-approach using Microsoft Excel to derive the stated putative sum formulae. However, fitting did not provide unambiguous results for all samples. \*the fitting of this sample gave inconsistencies or bad fitting quality. Elemental contents close to the ideal composition are highlighted in green, those very different from the ideal value are highlighted in red. Note, that the  $\text{H}^+$  content of each sample calculated by this method is highly sensitive to experimental fluctuations and should not be overinterpreted. Considerably lower anion amounts per sum formula found for the OBz-OMe sample is in line with pronounced  $\text{Ru}^0$ -NP formation.*

| Sample                              | Elemental contents [%] |      |      |       |       | Putative sum formula                                                              | Molar weight of repeating unit |
|-------------------------------------|------------------------|------|------|-------|-------|-----------------------------------------------------------------------------------|--------------------------------|
|                                     | C                      | H    | F    | O*    | Ru    |                                                                                   |                                |
| OAc                                 | 30.48                  | 1.33 | --   | 27.8  | 40.4  | $[\text{Ru}_3(\text{BTC})_{1.83}(\text{OAc})_{0.49}\text{H}_{2.09}]$              | 713.27                         |
| OAc (modx2)                         | 30.60                  | 1.28 | --   | 27.0  | 41.2  | $[\text{Ru}_3(\text{BTC})_{1.77}(\text{OAc})_{1.17}\text{H}_{0.48}]^*$            | 739.37                         |
| OBz                                 | 31.40                  | 1.26 | --   | 25.4  | 41.9  | $[\text{Ru}_3(\text{BTC})_{1.78}(\text{OBz})_{0.41}\text{H}_{1.63}]$              | 723.18                         |
| OBz-F                               | 30.70                  | 1.19 | 0.46 | 25.8  | 41.8  | $[\text{Ru}_3(\text{BTC})_{1.91}(\text{OBz-F})_{0.18}\text{H}_{2.13}]^*$          | 725.99                         |
| OBz- $\text{CF}_3$                  | 33.74                  | 1.42 | 3.03 | 29.2  | 32.6  | $[\text{Ru}_3(\text{BTC})_{2.58}(\text{OBz-}\text{CF}_3)_{0.5}\text{H}_{3.35}]^*$ | 935.51                         |
| OBz-Me                              | 31.67                  | 1.47 | --   | 37.71 | 29.2  | $[\text{Ru}_3(\text{BTC})_{3.58}(\text{OBz-Me})_0\text{H}_{4.74}]^*$              | 1184.61                        |
| OBz-OMe                             | 25.94                  | 0.98 | --   | 22.7  | 50.4  | $[\text{Ru}_3(\text{BTC})_{1.40}(\text{OBz-OMe})_{0.05}\text{H}_{1.28}]$          | 602.02                         |
| Mandelate                           | 30.67                  | 1.22 | --   | 26.4  | 41.7  | $[\text{Ru}_3(\text{BTC})_{1.93}(\text{mand})_{0.16}\text{H}_{1.94}]$             | 729.08                         |
| Ideal $[\text{Ru}_3(\text{BTC})_2]$ | 30.13                  | 0.84 | --   | 26.76 | 42.26 | $[\text{Ru}_3(\text{BTC})_2]$                                                     | 713.27                         |

On the basis of these idealized (bottom row) and putative sum formulae (all other lines), their respective molecular weight of the repeating unit was used to normalize the found BET surface areas. The following Table S 10 provides an overview on molar BET surface areas [ $\text{m}^2\text{mmol}^{-1}$ ] and the molar pore volumes [ $\text{cm}^3\text{mmol}^{-1}$ ] of all samples. For comparison values of the ideal Cu-HKUST-1 structure are supplemented.

Table S 10: Gravimetric BET surface areas (SA) and molar SAs [ $\text{m}^2\text{mmol}^{-1}$ ] and pore volumes (PV) [ $\text{cm}^3\text{mmol}^{-1}$ ] derived from idealized and calculated putative sum formulae. Total pore volumes refer to pores  $<387 \text{ \AA}$ . For comparison, the ideal Cu-HKUST-1 data is also provided. The ideal sum formula refers to  $717.44 \text{ mg mmol}^{-1}$  for Ru and  $604.87 \text{ mg mmol}^{-1}$  for Cu. The calculated sum formulae and respective molar weights are given in Table S 9 (right column). The values for the ideal Cu-HKUST-1 are derived from DFT simulations conducted in Ref.<sup>13</sup> The enormous coincidence of surface area and pore volume of the mandelate-based Ru-MOF sample is highlighted in comparison with the structural simulation (bottom row). Note, that both ideal and calculated sum formulae give very similar molar values supporting the general approach used herein.

| Sample                                   | Gravimetric                             |                                          | Based on ideal sum formula<br>[ $\text{Ru}_3(\text{BTC})_2$ ] |                                         | Based on calculated sum<br>formulae*   |                                         |
|------------------------------------------|-----------------------------------------|------------------------------------------|---------------------------------------------------------------|-----------------------------------------|----------------------------------------|-----------------------------------------|
|                                          | BET SA<br>[ $\text{m}^2\text{g}^{-1}$ ] | BET PV<br>[ $\text{cm}^3\text{g}^{-1}$ ] | SA<br>[ $\text{m}^2\text{mmol}^{-1}$ ]                        | PV<br>[ $\text{cm}^3\text{mmol}^{-1}$ ] | SA<br>[ $\text{m}^2\text{mmol}^{-1}$ ] | PV<br>[ $\text{cm}^3\text{mmol}^{-1}$ ] |
| OAc                                      | 1493                                    | 0.618                                    | 1071.13792                                                    | 0.444                                   | 1065                                   | 0.441                                   |
| OAc<br>(modx2)                           | n.d.                                    |                                          | n.d.                                                          | n.d.                                    | n.d.                                   | 0.000                                   |
| OBz                                      | 1432                                    | 0.584                                    | 1027                                                          | 0.420                                   | 1036                                   | 0.423                                   |
| OBz-F                                    | 1516                                    | 0.973                                    | 1088                                                          | 0.701                                   | 1101                                   | 0.706                                   |
| OBz-CF <sub>3</sub>                      | 987                                     | 0.413                                    | 708                                                           | 0.298                                   | 923                                    | 0.386                                   |
| OBz-Me                                   | 1401                                    | 0.516                                    | 1005                                                          | 0.372                                   | 1660                                   | 0.611                                   |
| OBz-OMe                                  | 1505                                    | 0.585                                    | 1080                                                          | 0.423                                   | 906                                    | 0.352                                   |
| Mandelate                                | 1789                                    | 0.681                                    | 1284                                                          | 0.493                                   | 1304                                   | 0.497                                   |
| Ideal<br>[ $\text{Cu}_3(\text{BTC})_2$ ] | 2137                                    | 0.820                                    | 1293                                                          | 0.496                                   | 1293                                   | 0.496                                   |

## Vibrational spectroscopy

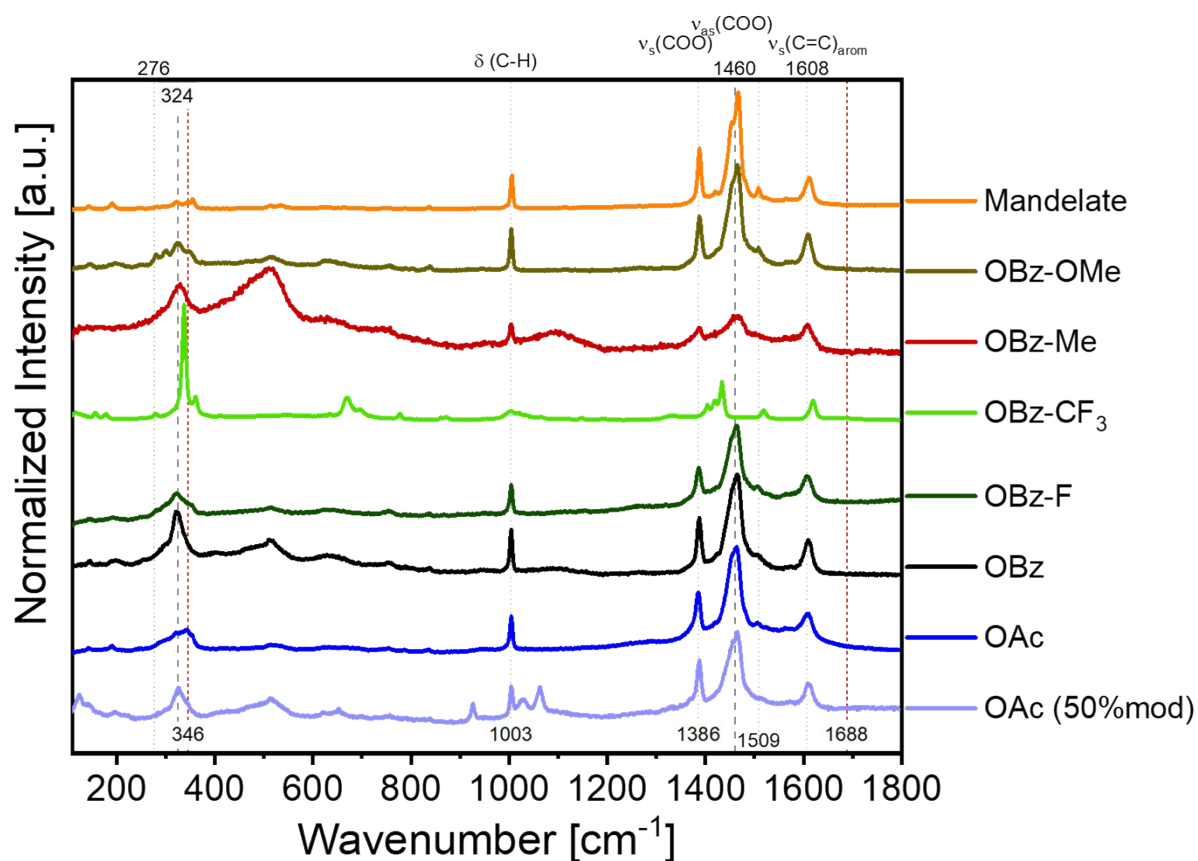

Figure S 22: Raman spectra of the whole Ru<sup>II</sup>-HKUST-1 series indicate a generally identical bonding situation in all samples. However, the spectrum of OBz-CF<sub>3</sub> is dominated by strong signals arising from the respective modulator residues with the usually strong  $\nu_{as}(\text{COO})$  at 1460 cm<sup>-1</sup> even not being visible. According to the absence of peaks around 1688 cm<sup>-1</sup>, no free carboxylic acids are present in the samples.

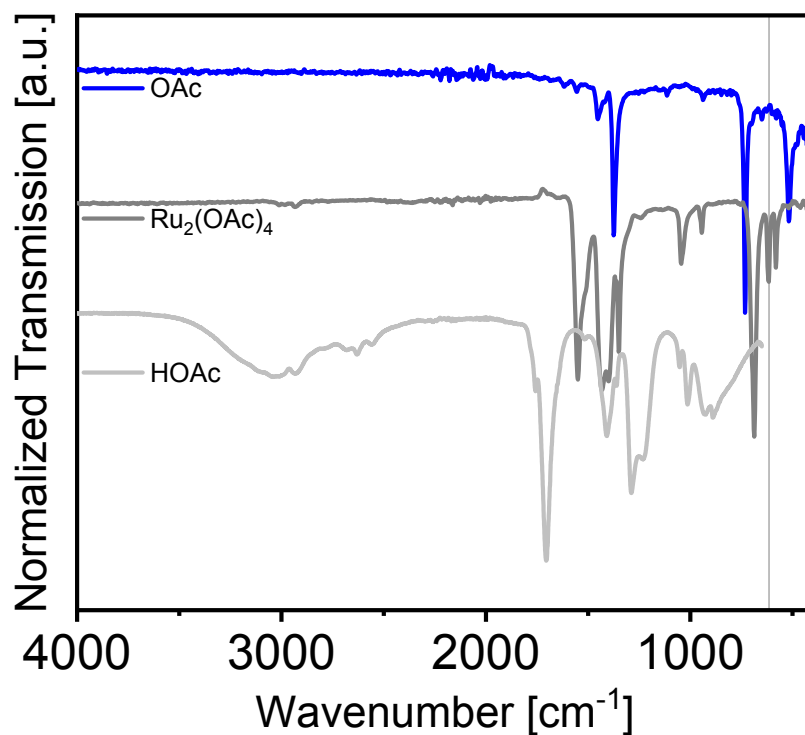

Figure S 23: Comparison of Ru-HKUST-1 (blue trace), the used OAc precursor (dark grey trace) and the free carboxylic acid (light grey trace). Vertical lines highlight vibration bands of the respective MOF sample which can not be assigned to the ideal MOF structure and thus, have to be associated with either precursor or modulator.

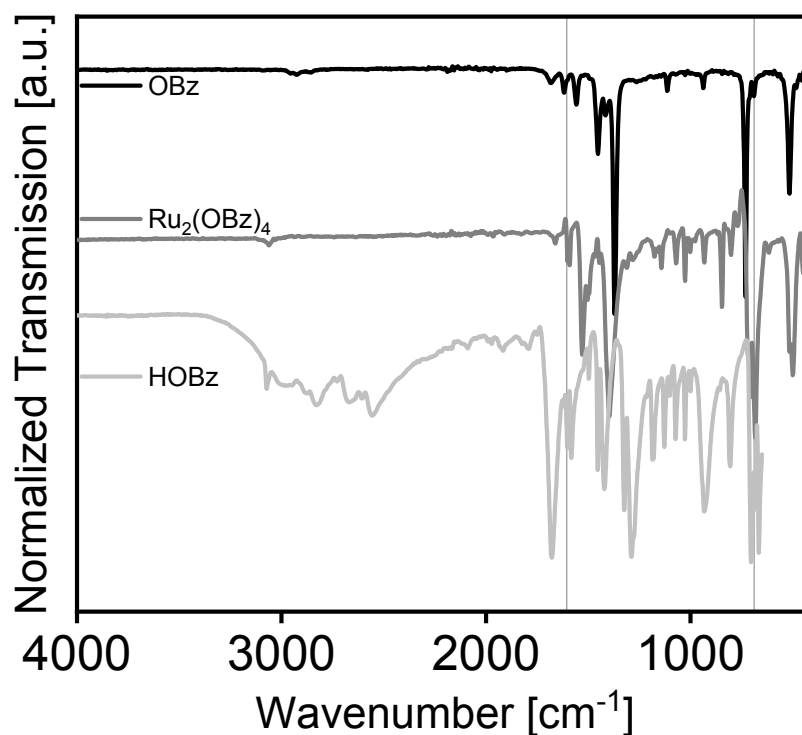

Figure S 24: Comparison of Ru-HKUST-1 (black trace), the used OBz precursor (dark grey trace) and the free carboxylic acid (light grey trace). Vertical lines highlight vibration bands of the respective MOF sample which can not be assigned to the ideal MOF structure and thus, have to be associated with either precursor or modulator.

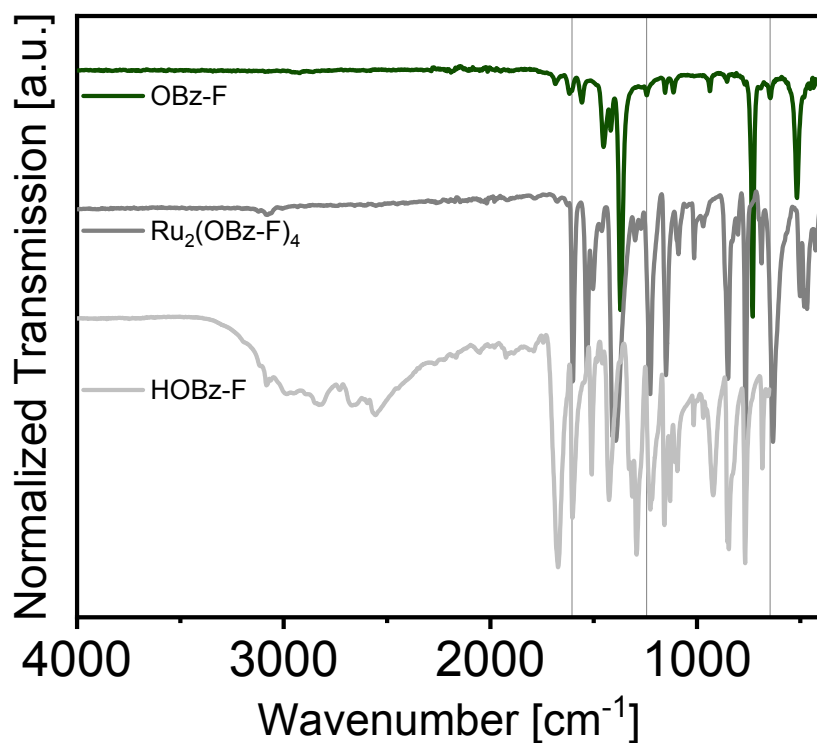

Figure S 25: Comparison of Ru-HKUST-1 (dark green trace), the used OBz-F precursor (dark grey trace) and the free carboxylic acid (light grey trace). Vertical lines highlight vibration bands of the respective MOF sample which can not be assigned to the ideal MOF structure and thus, have to be associated with either precursor or modulator.

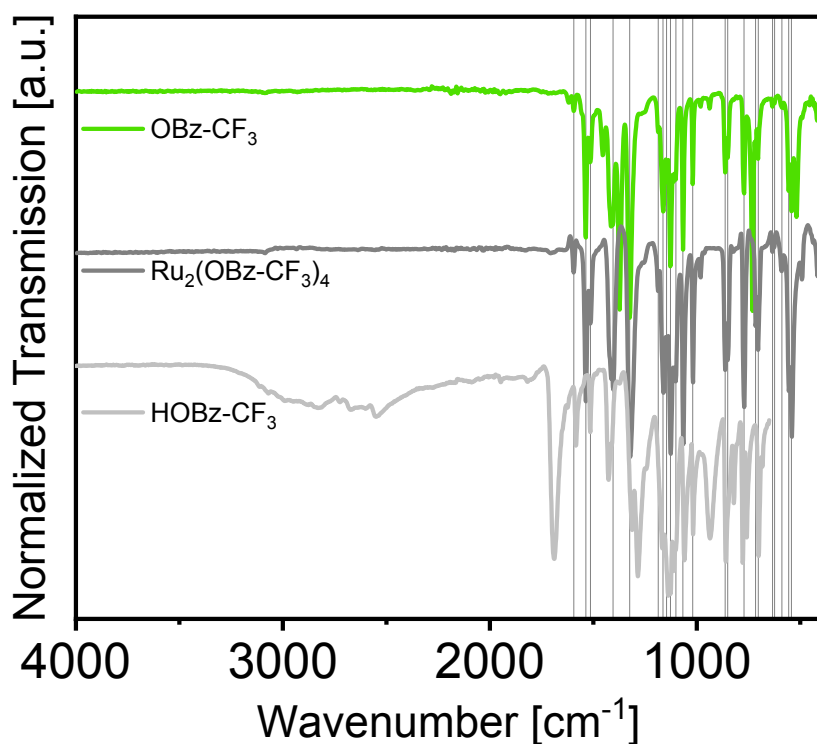

Figure S 26: Comparison of Ru-HKUST-1 (green trace), the used OBz-CF<sub>3</sub> precursor (dark grey trace) and the free carboxylic acid (light grey trace). Vertical lines highlight vibration bands of the respective MOF sample which can not be assigned to the ideal MOF structure and thus, have to be associated with either precursor or modulator. As compared to other samples of this series, the OBz-CF<sub>3</sub> spectra contain large amounts of residual precursor/modulator.

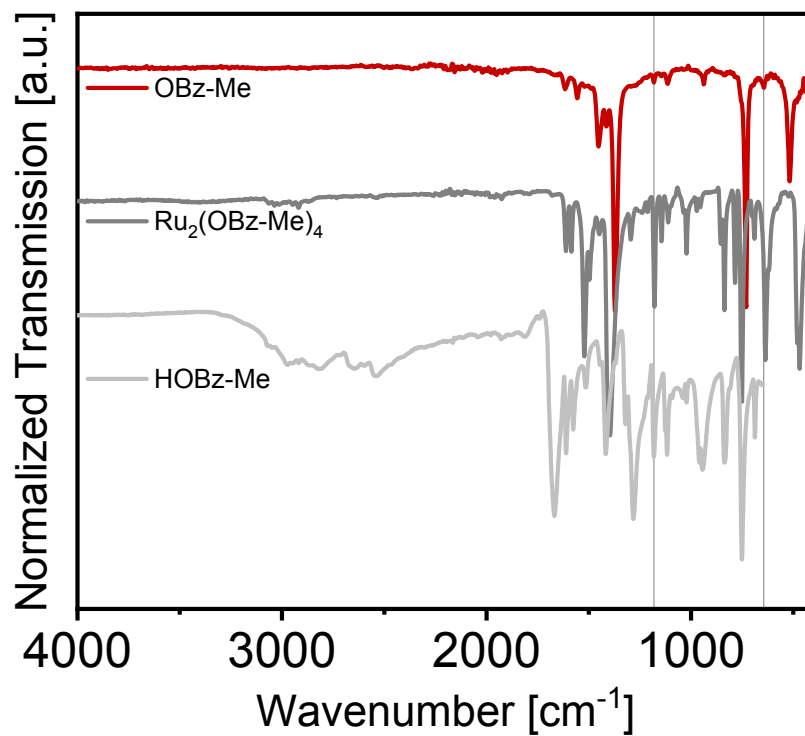

Figure S 27: Comparison of Ru-HKUST-1 (red trace), the used OBz-CF<sub>3</sub> precursor (dark grey trace) and the free carboxylic acid (light grey trace). Vertical lines highlight vibration bands of the respective MOF sample which can not be assigned to the ideal MOF structure and thus, have to be associated with either precursor or modulator.

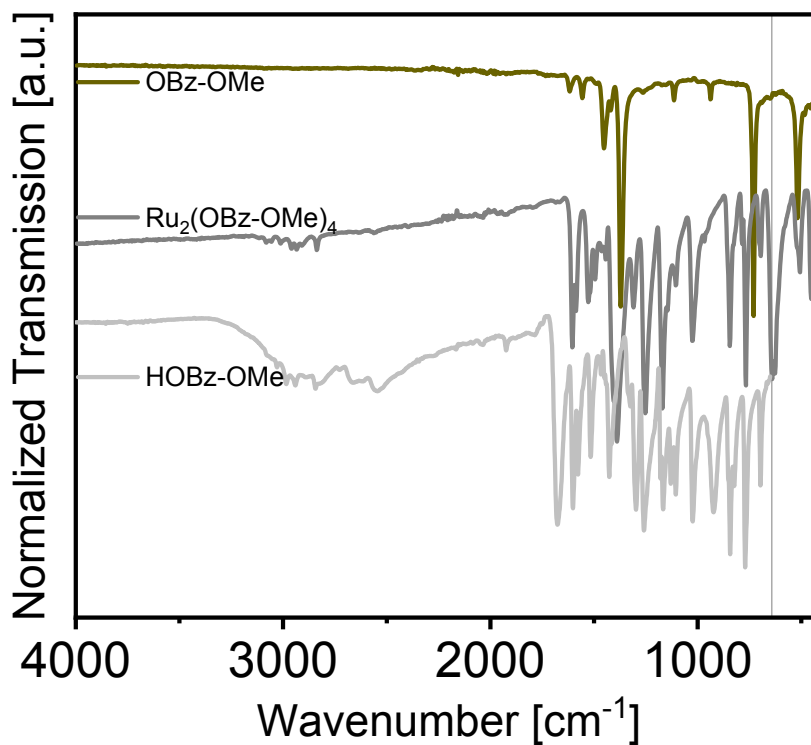

Figure S 28: Comparison of Ru-HKUST-1 (olive trace), the used OBz-CF<sub>3</sub> precursor (dark grey trace) and the free carboxylic acid (light grey trace). Vertical lines highlight vibration bands of the respective MOF sample which can not be assigned to the ideal MOF structure and thus, have to be associated with either precursor or modulator.



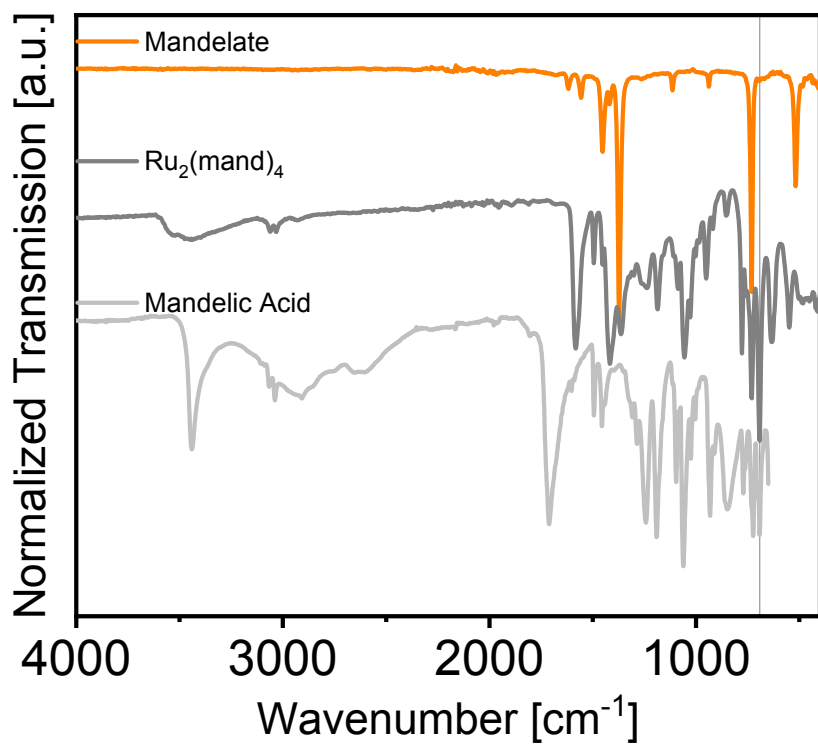

Figure S 29: Comparison of Ru-HKUST-1 (orange trace), the used OBz-CF<sub>3</sub> precursor (dark grey trace) and the free carboxylic acid (light grey trace). Vertical lines highlight vibration bands of the respective MOF sample which can not be assigned to the ideal MOF structure and thus, have to be associated with either precursor or modulator.

## HR-TEM

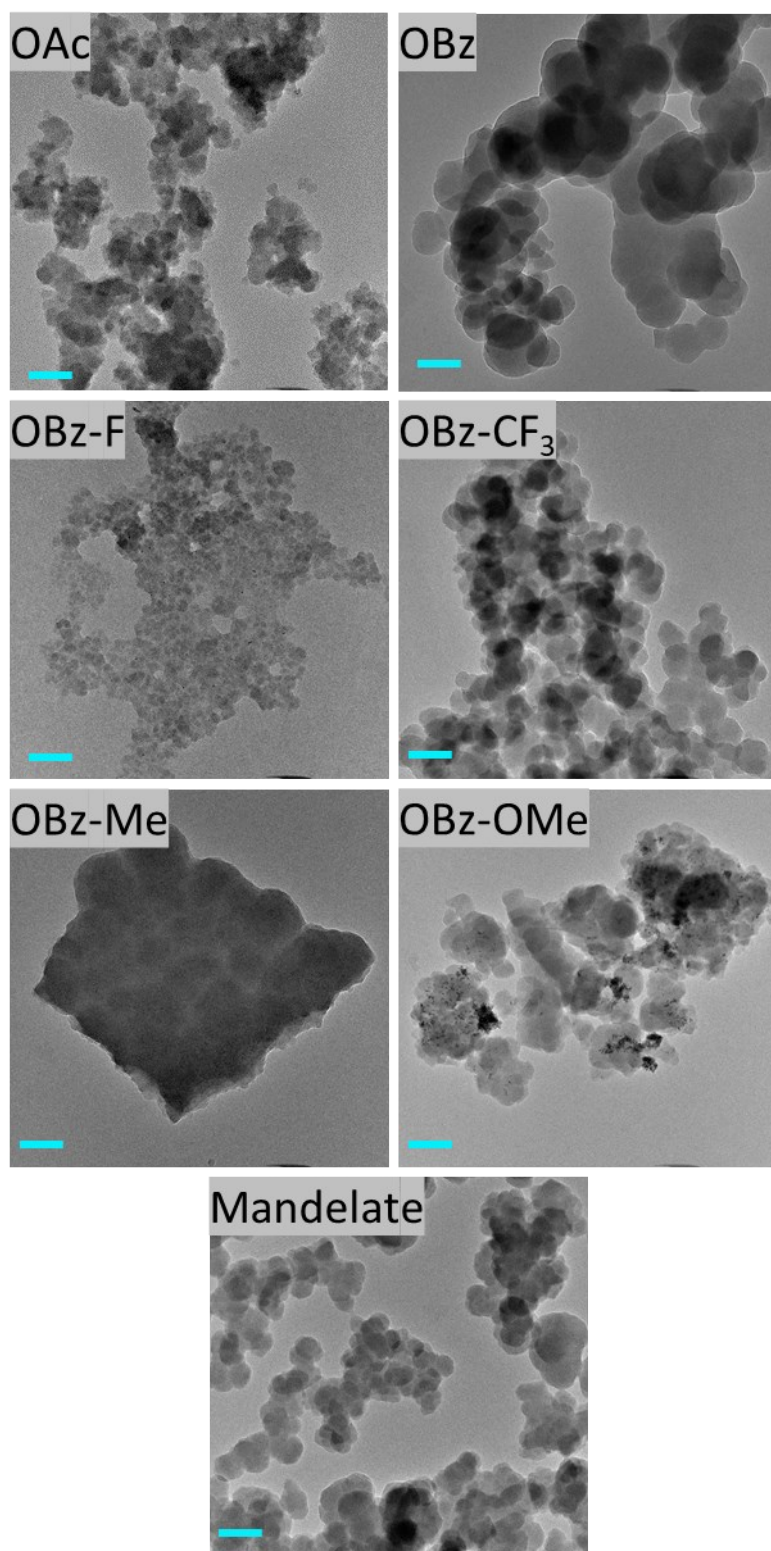

Figure S 30: HR-TEM images of all Ru-MOF samples. Blue scale bars represent 100 nm. The increased primary particle size particularly of the samples OBz, OBz-CF<sub>3</sub>, OBz-Me and Mandelate is in line with results from FWHM analysis from PXRD patterns. The OAc and OBz-F samples contain few metal NPs while the OBz-OMe sample comprises higher amounts.

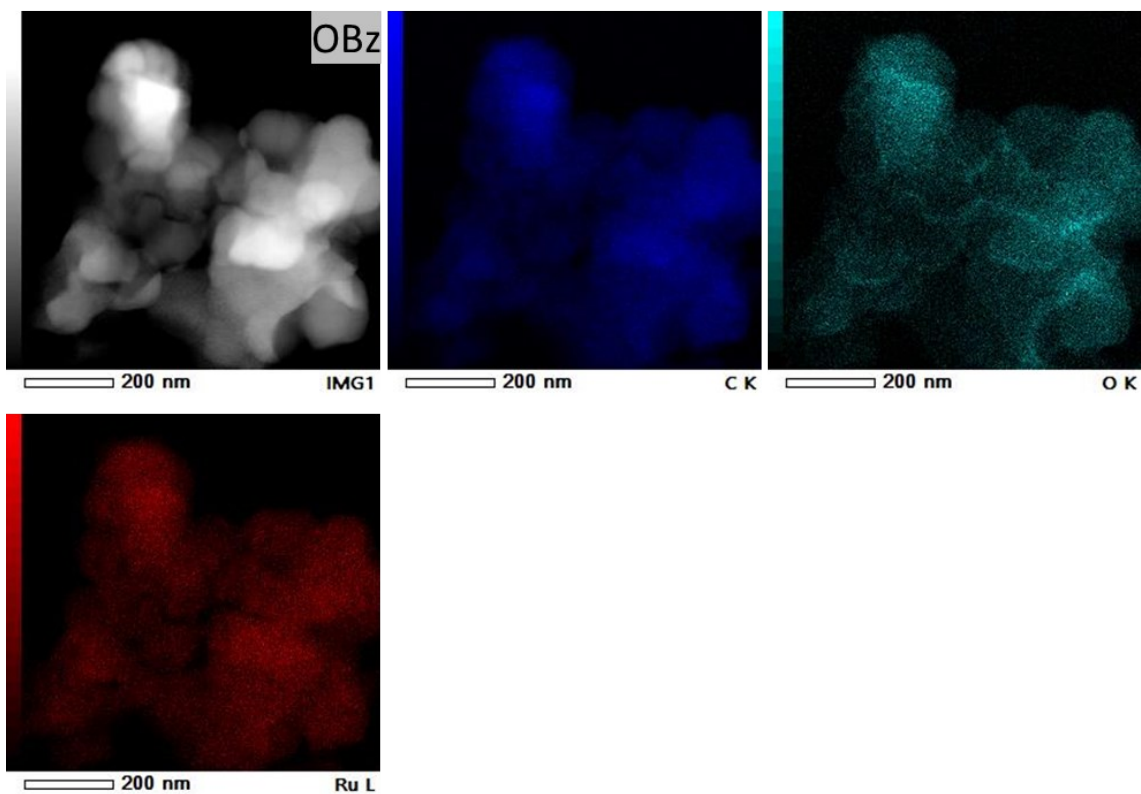

Figure S 31: A dark field STEM image of a representative particles of the OBz sample and corresponding EDS compositional maps of C, O and Ru indicates a homogeneous elemental distribution. Scale bars represent 200 nm.

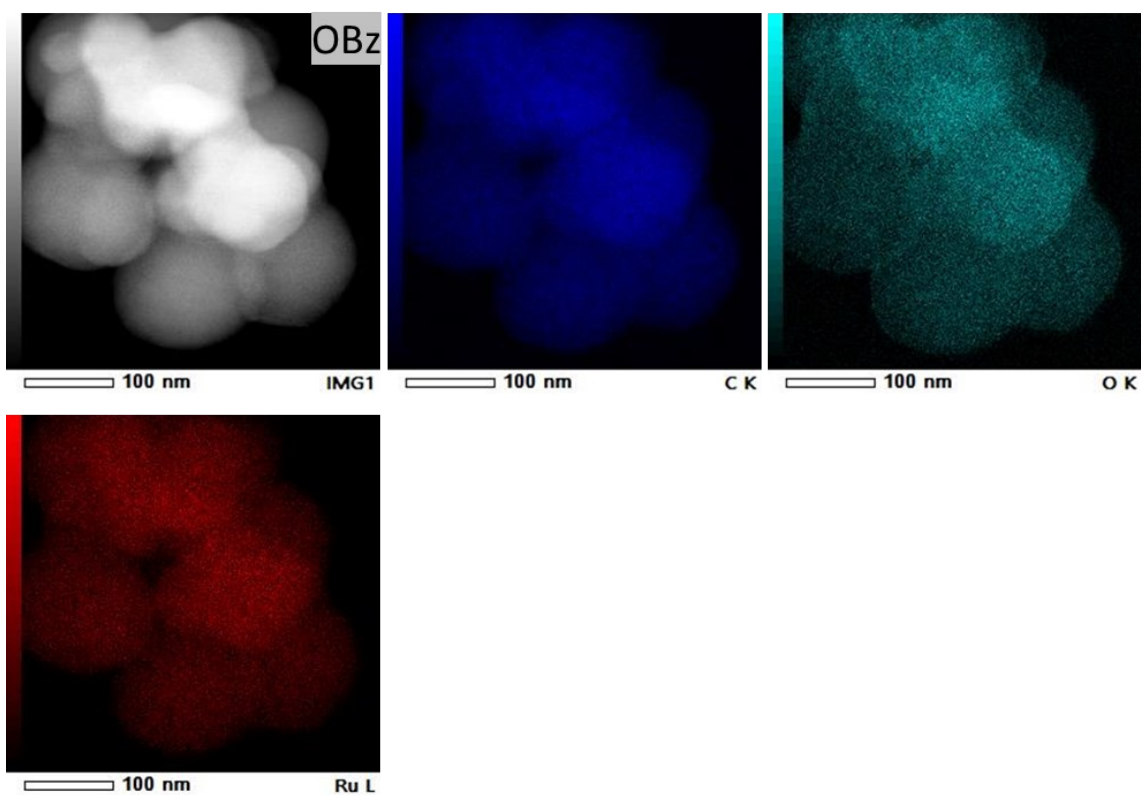

Figure S 32: A dark field STEM image of a representative particles of the OBz sample and corresponding EDS compositional maps of C, O and Ru indicates a homogeneous elemental distribution. Scale bars represent 100 nm.

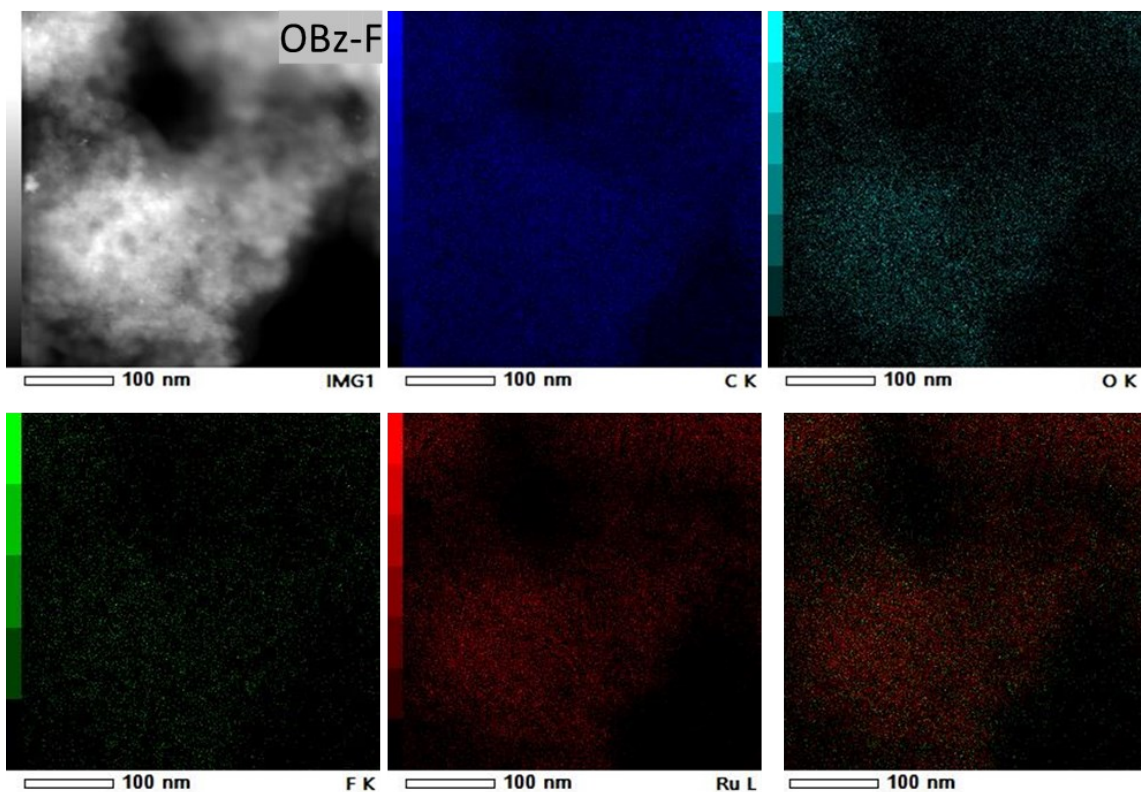

Figure S 33: A dark field STEM image of a representative particles of the OBz-F sample and corresponding EDS compositional maps of C, O and Ru indicates relatively homogeneous elemental distribution. Scale bars represent 100 nm. The bottom right image is an overlay of fluorine (green) and ruthenium (red). Due to the small particle size, clear conclusions on elemental inhomogeneities are difficult to draw.

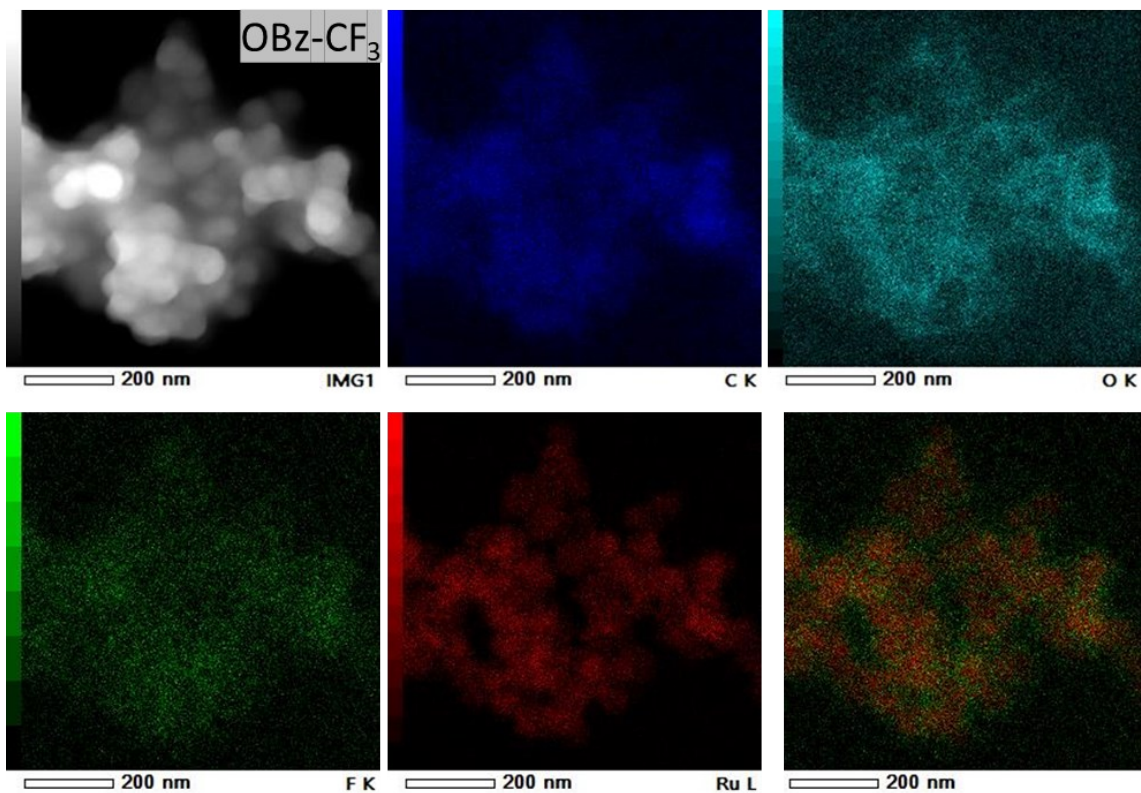

Figure S 34: A dark field STEM image of a representative particles of the OBz-CF<sub>3</sub> sample and corresponding EDS compositional maps of C, O, F and Ru and an overlay of F/Ru. Scale bars represent 200 nm. The bottom right image is an overlay of fluorine (green) and ruthenium (red). The images suggest the modulator to be preferentially located at the surface of the particles.

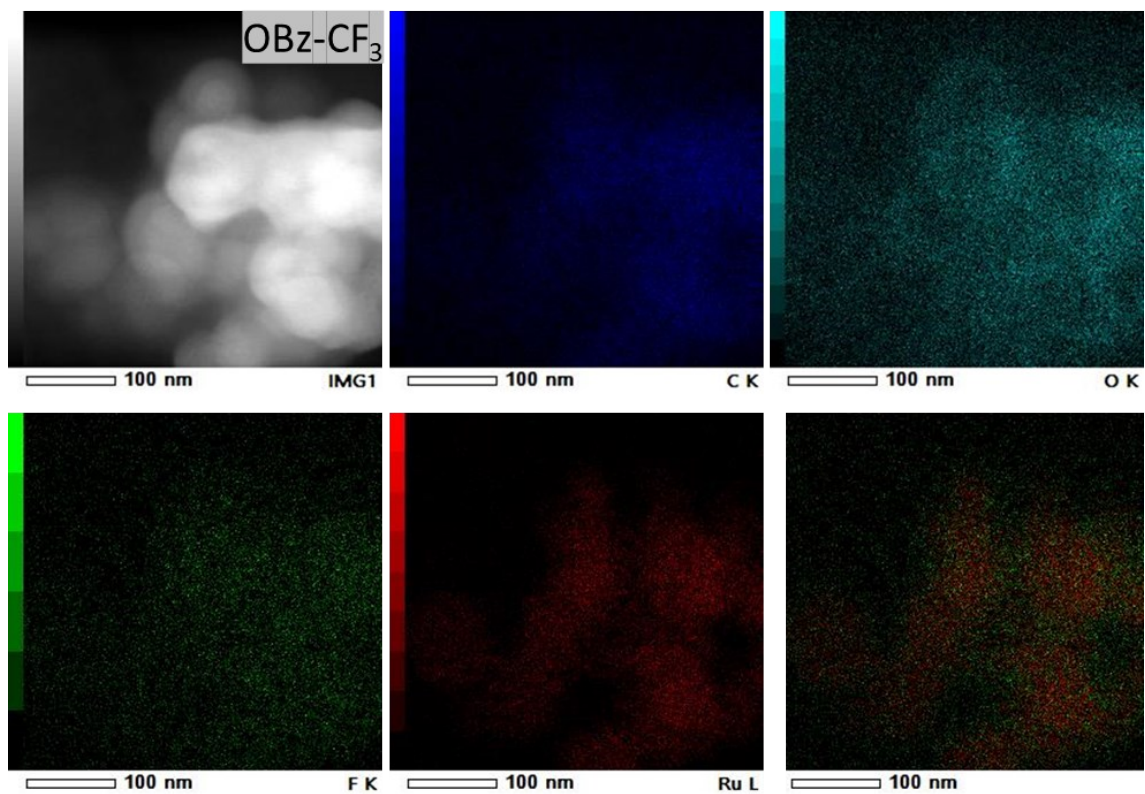

Figure S 35: A dark field STEM image of a representative particles of the OBz-CF<sub>3</sub> sample and corresponding EDS compositional maps of C, O, F and Ru and an overlay of F/Ru. Scale bars represent 100 nm. The bottom right image is an overlay of fluorine (green) and ruthenium (red). The images suggest the modulator to be preferentially located at the surface of the particles.

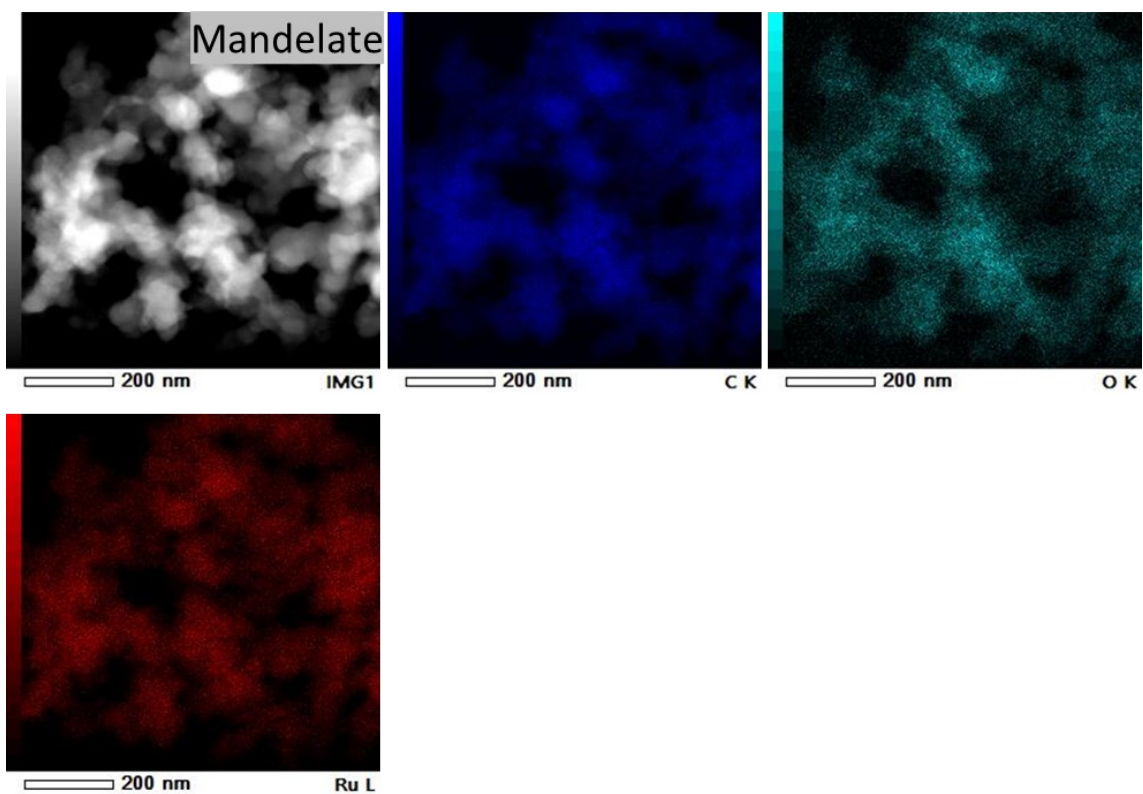

Figure S 36: A dark field STEM image of a representative particles of the mandelate-derived MOF sample and corresponding EDS compositional maps of C, O and Ru indicates a homogeneous elemental distribution. Scale bars represent 200 nm.

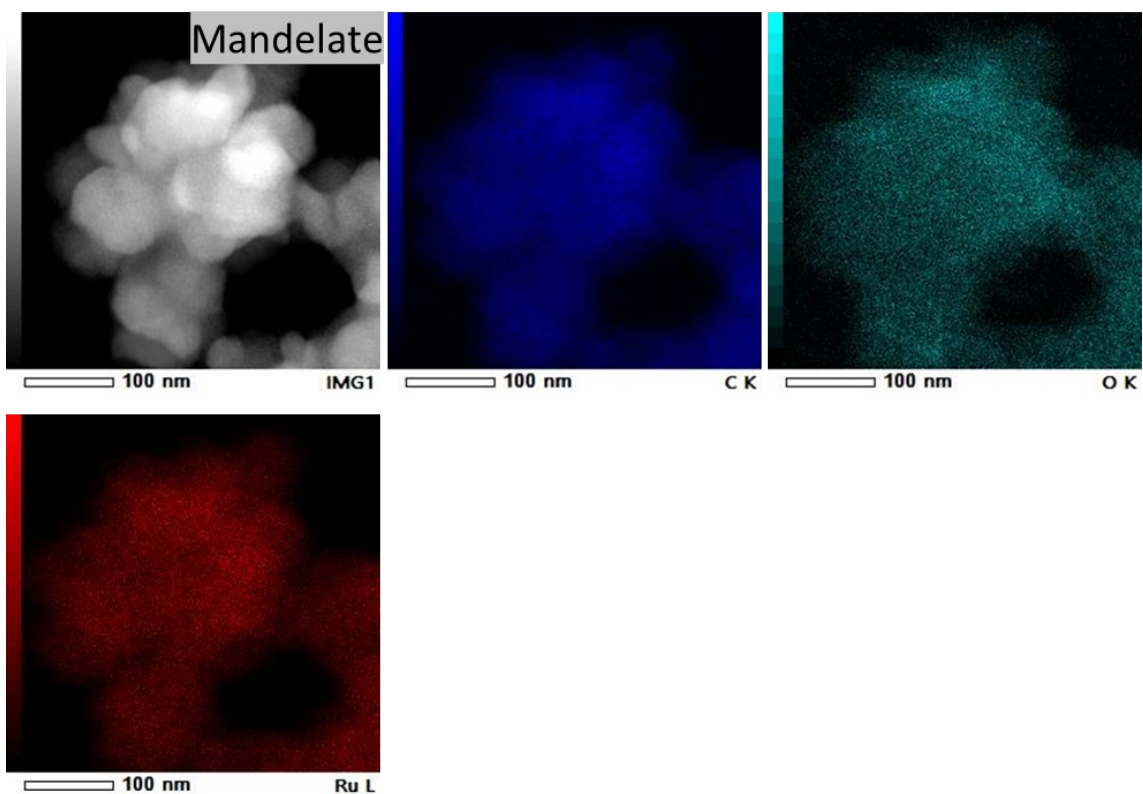

Figure S 37: A dark field STEM image of a representative particles of the mandelate-derived MOF sample and corresponding EDS compositional maps of C, O and Ru indicates a homogeneous elemental distribution. Scale bars represent 200 nm.

1. W. R. Heinz, T. Kratky, M. Drees, A. Wimmer, O. Tomanec, S. Günther, M. Schuster and R. A. Fischer, *Dalton Trans.*, 2019, **48**, 12031-12039.
2. A. J. Lindsay, G. Wilkinson, M. Motevalli and M. B. Hursthouse, *J. Chem. Soc., Dalton Trans.*, 1985, DOI: 10.1039/DT9850002321, 2321-2326.
3. R. W. Mitchell, A. Spencer and G. Wilkinson, *J. Chem. Soc., Dalton Trans.*, 1973, DOI: 10.1039/DT9730000846, 846-854.
4. F. A. Cotton, V. M. Miskowski and B. Zhong, *J. Am. Chem. Soc.*, 1989, **111**, 6177-6182.
5. V.F.Kuznetsov, H.Alper and G.P.A.Yap, CCDC 136234: Experimental Crystal Structure Determination, 2000, DOI: 10.5517/cc4krn2
6. A. J. Lindsay, G. Wilkinson, M. Motevalli and M. B. Hursthouse, *J. Chem. Soc., Dalton Trans.*, 1987, DOI: 10.1039/DT9870002723, 2723-2736.
7. M. Spohn, J. Strähle and W. Hiller, *Zeitschrift für Naturforschung*, 1986, **41b**, 541-547.
8. M. C. Barral, R. González-Prieto, R. Jiménez-Aparicio, J. L. Priego, M. R. Torres and F. A. Urbanos, *Inorg. Chim. Acta*, 2005, **358**, 217-221.
9. H. Miyasaka, N. Motokawa, R. Atsuumi, H. Kamo, Y. Asai and M. Yamashita, *Dalton Trans.*, 2011, **40**, 673-682.
10. Y. Sekine, K. H. Aliyah, T. Shimada, J. Zhang, W. Kosaka and H. Miyasaka, *Chem. Lett.*, 2018, **47**, 693-696.
11. D. S. Martin, R. A. Newman and L. M. Vlasnik, *Inorg. Chem.*, 1980, **19**, 3404-3407.
12. G. Vamvounis, J. F. Caplan, T. S. Cameron, K. N. Robertson and M. A. S. Aquino, *Inorg. Chim. Acta*, 2000, **304**, 87-98.
13. J. Liu, J. T. Culp, S. Natesakhawat, B. C. Bockrath, B. Zande, S. G. Sankar, G. Garberoglio and J. K. Johnson, *J. Phys. Chem. C*, 2007, **111**, 9305-9313.
